1 **Effect of short-term prescription opioids on DNA methylation of the**

2 ***OPRM1* promoter**

3 Jose Vladimir Sandoval-Sierra<sup>1</sup>, Francisco I Salgado García<sup>1</sup>, Jeffrey H Brooks<sup>2</sup>,

4 Karen J Derefinko<sup>1</sup>, Khyobeni Mozhui<sup>1\*</sup>

5

6 <sup>1</sup> Department of Preventive Medicine, College of Medicine, University of

7 Tennessee Health Science Center, Memphis, Tennessee, USA

8 <sup>2</sup> Department of Oral and Maxillofacial Surgery, College of Dentistry, University of

9 Tennessee Health Science Center, Memphis, Tennessee, USA

10

11 **\*Corresponding author: [kmozhui@uthsc.edu](mailto:kmozhui@uthsc.edu)**

12

## 13 **Abstract**

14 **Background.** Long-term opioid use has been associated with hypermethylation of the opioid  
15 receptor mu 1 (*OPRM1*) promoter. Very little is currently known about the early epigenetic  
16 response to therapeutic opioids. Here we examine whether we can detect DNA methylation  
17 changes associated with few days use of prescribed opioids. Genome-wide DNA methylation  
18 was assayed in a cohort of 33 opioid-naïve participants who underwent standard dental surgery  
19 followed by opioid self-administration. Saliva samples were collected before surgery (visit 1),  
20 and at two postsurgery visits at  $2.7 \pm 1.5$  days (visit 2), and  $39 \pm 10$  days (visit 3) after the  
21 discontinuation of opioid analgesics.

22 **Results.** The perioperative methylome underwent significant changes over the three visits that  
23 was primarily due to postoperative inflammatory response and cell heterogeneity. To  
24 specifically examine the effect of opioids, we started with a candidate gene approach and  
25 evaluated 10 CpGs located in the *OPRM1* promoter. There was significant cross-sectional  
26 variability in opioid use, and for participants who self-administered the prescribed drugs, the  
27 total dosage ranged from 5–210 morphine milligram equivalent (MME). Participants were  
28 categorized by cumulative dosage into three groups: <25 MME, 25–90 MME,  $\geq 90$  MME. Using  
29 mixed effects modeling, 4 CpGs had significant positive associations with opioid dose at 2-tailed  
30 p-value < 0.05, and overall, 9 of the 10 *OPRM1* promoter CpGs showed the predicted higher  
31 methylation in the higher dose groups relative to the lowest dose group. After adjustment for  
32 age, cellular heterogeneity, and past tobacco use, the promoter mean methylation also had  
33 positive associations with cumulative MME (regression coefficient = 0.0002, 1-tailed p-value =  
34 0.02), and duration of opioid use (regression coefficient = 0.003, 1-tailed p-value = 0.001), but

35 this effect was significant only for visit 3. A preliminary epigenome-wide association study  
36 identified a significant CpG in the promoter of the RAS-related signaling gene, *RASL10A*, that  
37 may be predictive of opioid dosage.

38 **Conclusion.** The present study provides evidence that the hypermethylation of the *OPRM1*  
39 promoter is in response to opioid use, and that epigenetic differences in *OPRM1* and other sites  
40 are associated with short-term use of therapeutic opioids.

41

42 **Key words:** prescription opioids, DNA methylation, addiction, opioid use disorder,  
43 epigenetics

## 44 **Background**

45 Prescription opioids were once considered as a relatively benign treatment for pain  
46 management [1, 2]. However, over the past decade, prescribed analgesics have emerged as a  
47 major socio-environmental factor that has contributed to the opioid epidemic [3, 4]. For many  
48 individuals who develop opioid use disorder (OUD), the initiation phase may begin with  
49 treatment for acute pain or minor surgery, with primary care physicians and dentists  
50 accounting for a large fraction of prescribed opioids [5-11]. Even short-term use (e.g., up to  
51 three days) is a risk factor for some individuals, and the risk for addiction increases  
52 proportionally with dosage and duration of use [8, 9, 12-15].

53 Drug addiction is a chronic disease that is triggered by an exposure to an environmental agent.  
54 Following the initial exposure, the addictive substance continues to have a persistent effect,  
55 and this suggests a form of cellular memory. There is strong evidence that epigenetic processes,  
56 including DNA methylation, play a key role in maintaining the long-term effects of the addictive  
57 substance [16, 17]. Studies particularly in model organisms have shown that drugs of abuse  
58 trigger intracellular signaling cascades that alter gene transcription; repeated exposure to the  
59 drug then results in remodeling of the epigenome that persists over time; and these epigenetic  
60 processes maintain the long-term changes in steady-state gene expression that underlie  
61 addiction [16, 18-20]. Work in humans generally relies on postmortem tissue from long-term  
62 drug users, and studies have found significant epigenetic differences in brains of former addicts  
63 compared to non-addicts [21, 22]. While the brain is the most relevant tissue in terms of  
64 neuroadaptation and drug seeking behavior, epigenetic markers of addiction have also been  
65 detected in peripheral tissues such as blood and sperm [23-28]. Easily accessible peripheral

66 tissues are clearly the practical choice when it comes to defining biomarkers of drug use and/or  
67 predictors of individual risk for addiction.

68 The  $\mu$ -opioid receptor gene (*OPRM1*) encodes the primary target for both endogenous and  
69 exogenous opioids and plays a central role in mediating the rewarding and therapeutic effects.  
70 The CpG island located in the promoter of this gene is a potential sensor for drug use, and  
71 multiple studies in leukocytes and sperm have found higher DNA methylation among long-term  
72 opioid users compared to control samples [23, 29-33]. Hypermethylation of the promoter  
73 region has also been found among people with alcohol dependence [34]. However, as all these  
74 studies are cross-sectional comparisons between opioid-exposed individuals and controls, there  
75 is no definite way to discern whether the epigenetic differences are the cause, or effect, of drug  
76 use. Since genetic variants both within, and near the *OPRM1* gene have also been associated  
77 with susceptibility to addiction and drug sensitivity[35-37], it is plausible that such epigenetic  
78 markers represent genetic effects that preceded drug use. Another lingering question is, if the  
79 epigenetic changes are induced by drug use, does the hypermethylation of the promoter CpGs  
80 occur only after repeated and sustained exposure, or are these indicators of the early  
81 epigenomic, and potentially transcriptomic, responses to drugs? In the case of potent drugs  
82 such as opioids, the initial exposure is a crucial phase in the pathway to drug dependence and  
83 addiction, and it is reasonable to expect that some of the modification to the epigenome occurs  
84 within the first few exposures.

85 To address these questions, we applied a longitudinal design and collected saliva samples and  
86 self-reports of opioid use from a group of opioid naïve dental patients before oral surgery, and  
87 at two follow-up visits after surgery. We assayed genome-wide DNA methylation and explored

88 (1) the methylome during the perioperative period, (2) how demographic variables such as age  
89 and race/ethnicity relate to methylome changes and immune response, and (3) whether we can  
90 discern opioid associated CpGs from the highly heterogeneous methylome data. As the site of  
91 surgery and postsurgery inflammatory response, the saliva presents particular challenges due  
92 to immune-related cellular heterogeneity. To overcome this, we applied *in-silico* approaches to  
93 deconvolute the underlying cellular heterogeneity and demonstrate the utility of the  
94 methylome-based cell estimates as proxies for the immune changes induced by surgery. For the  
95 effect of opioids, we specifically focused on the *OPRM1* promoter CpGs and evaluated whether  
96 the data replicates the CpG hypermethylation. Overall our results show a dose-dependent  
97 increase in methylation at the *OPRM1* promoter that can be discerned despite extensive  
98 heterogeneity in the methylome data, and this indicates that the epigenetic response to opioids  
99 occurs within the first few days to weeks following drug exposure. Additionally, we also  
100 performed an epigenome-wide association study (EWAS), and this identified a few CpGs that  
101 may be predictive of opioid dosing.

## 102 **Results**

103 The number of enrolled participants (N = 41) and timeline of sample collection are shown in Fig.  
104 1. Only 33 patients (19 females) received prescription opioids after an oral procedure. The  
105 baseline characteristics, other diagnosed diseases, casual use of other drugs (specifically  
106 tobacco and marijuana; no participant reported use of cocaine, psychedelics, and other hard  
107 drugs), and prescription opioid self-administration are reported only for these 33 participants  
108 (Table 1). Following the pre-surgery visit (visit 1 or v1), the second visit (visit 2 or v2) occurred  
109 after surgery and within a week of the last opioid dose (average number of days between last

110 opioid dose and visit 2 was  $2.7 \pm 1.5$  days). The last sample collection (visit 3 or v3) occurred  
111 between 32–88 days from surgery, and the number of days between the last opioid dose and  
112 visit 3 was  $39 \pm 10$  days. In total, 26 participants provided saliva samples at all three visits, 6  
113 participants provided saliva at two visits, and one provided saliva only at v1 (Table 1). The mean  
114 age was  $33.61 \pm 13.84$  years and ranged from 19 to 61 years (Table 1). Based on self-reported  
115 race/ethnicity, there were 13 Caucasians (mean age =  $31.69 \pm 14.11$  years), 13 African  
116 Americans (mean age =  $39.92 \pm 13.91$ ), and the remaining 7 were of “other” racial/ethnic group  
117 (mostly Hispanic/Latino; mean age =  $25.43 \pm 8.02$ ). The African American group was slightly  
118 older but there was no statistically significant difference in age between the groups (p-value =  
119 0.06). Sex distribution was not significantly different between the race/ethnic groups. Individual  
120 level information, including comorbidities, is provided as Additional file 1: Table S1.  
121 Postoperative opioid dosing data was based on self-reported pill counts converted to morphine  
122 milligram equivalent (MME). With the exception of one individual who used no opioids (and we  
123 considered this individual to represent a dose of 0 MME with 0 days of use), all patients started  
124 opioid treatment generally within 24 hours of surgery, and continued use for an average of  $6 \pm$   
125 4 days for up to 17 days (Additional file 1: Table S1). As expected, cumulative dosage correlated  
126 with length of use ( $r = 0.67$ , p-value  $< 0.0001$ ). For the 32 participants that self-administered  
127 opioids, the total cumulative dosage over the course of treatment ranged from 5–210 MME.  
128 Based on the quantile distribution of the cumulative MME, participants were classified into  
129 three groups:  $<25$  MME (those below the 25<sup>th</sup> percentile or quartile 1 for opioid dosage) , 25–90  
130 MME (those within the interquartile range), and  $\geq 90$  MME (those above the 75<sup>th</sup> percentile or  
131 quartile 3) (Table 1). Opioid dosage showed no significant association with age, sex, and self-

132 reported race/ethnicity. There was no significant association between opioid dosage and the  
 133 presence or absence of other comorbidities. Dosage was also not associated with past  
 134 marijuana use. However, the group that reported using tobacco within the past 12 months had  
 135 significantly higher self-administered opioid dosage (mean of  $95.63 \pm 57.78$  MME among  
 136 tobacco users, and  $49.55 \pm 36.19$  MME among non-users;  $p$ -value = 0.008).

137 **Table 1. Participant characteristics and postoperative opioid use**

| <b>Variables<sup>a</sup></b>                                   |                   |
|----------------------------------------------------------------|-------------------|
| <b>Sex</b>                                                     |                   |
| Female                                                         | 19                |
| Male                                                           | 14                |
| <b>Age (years)</b>                                             | $33.61 \pm 13.84$ |
| <b>Self-reported race/ethnicity</b>                            |                   |
| African-American                                               | 13                |
| Caucasian                                                      | 13                |
| Other <sup>b</sup>                                             | 7                 |
| <b>Tobacco in past 12 months<sup>c</sup></b>                   |                   |
| Yes                                                            | 11                |
| No                                                             | 22                |
| <b>Marijuana in past 12 months<sup>c</sup></b>                 |                   |
| Yes                                                            | 10                |
| No                                                             | 23                |
| <b>Other disease diagnosis<sup>c</sup></b>                     |                   |
| Yes                                                            | 17                |
| No                                                             | 16                |
| <b>Prescribed opioid medication</b>                            |                   |
| Hydrocodone 5mg                                                | 19                |
| Oxycodone 5mg                                                  | 12                |
| Oxycodone 10mg                                                 | 1                 |
| Oxycodone 5mg and Codeine 30mg                                 | 1                 |
| <b>Length of opioid use in days (mean <math>\pm</math> sd)</b> | $6 \pm 4$         |
| <b>MME<sup>d</sup> (mean <math>\pm</math> sd)</b>              | $64.91 \pm 48.88$ |
| <25 MME (<Q1)                                                  | 10                |
| 25–90 MME (Q1–Q3)                                              | 13                |
| $\geq 90$ MME ( $\geq$ Q3)                                     | 10                |
| <b>Surgery to visit 2 in days (mean <math>\pm</math> sd)</b>   | $8.0 \pm 4.1$     |
| <b>Surgery to visit 3 in days (mean <math>\pm</math> sd)</b>   | $43.9 \pm 10.9$   |
| <b>Number of completed visits</b>                              |                   |
| Three visits (v1, v2, and v3)                                  | 26 participants   |



|                        |                             |
|------------------------|-----------------------------|
| Two visits (v1 and v2) | 5 participants <sup>e</sup> |
| Two visits (v2 and v3) | 1 participant               |
| Only v1                | 1 participant               |

138 <sup>a</sup> Mean and standard deviation (sd) for continuous variables and counts for categorical variables

139 <sup>b</sup> Other= Hispanic/Latino, Asian, Middle-eastern, and Native American

140 <sup>c</sup> Self-reported data on other drug use and diagnosis of other diseases (diseases listed in Additional file 1: Table S1)

141 <sup>d</sup> Opioid dose converted to morphine milligram equivalent (MME) according to medication type; Q1 is the first  
142 quartile (25%) and Q3 is the third quartile (75%)

143 <sup>e</sup> Methylome data for one participant with v1 and v2 samples were excluded during the methylome data check  
144 (see methods)

145

## 146 **Global shift in postoperative methylome**

147 For an overview of the methylome and the variance structure, we started with a principal  
148 component analysis (PCA) using the full set of high quality probes (736,432 probes passed QC  
149 criteria). The top PC (PC1) captured a vast portion of the variance at 63.5%, and following that,  
150 PC2 and PC3 captured only 2.5% and 1.6% of variance, respectively (PCs for each methylome  
151 data in Additional file 1: Table S2). PC1 was not significantly associated with the demographic  
152 variables (sex, age, self-reported race/ethnicity), or with comorbidities and past use of  
153 marijuana or tobacco. Instead, visit was the most significant explanatory variable for PC1 ( $F_{2,86} =$   
154 5.94,  $p$ -value = 0.004), and the pattern indicated a significant change in the methylome with the  
155 strongest contrast between v3 and v2 (Tukey-Kramer *post hoc*  $p$ -value = 0.003) (Fig. 2a). To  
156 deduce whether the longitudinal variance capture by PC1 could be explained by the length of  
157 time from surgery or opioid self-administration, we performed bivariate analyses between PC1  
158 and the following variables: opioid dose, days from surgery to sample collection, and days from  
159 last opioid self-administration to sample collection. This analysis was done for the three visits  
160 separately, and at v2, PC1 had a modest but significant correlation with days from surgery to v2  
161 ( $r = 0.40$ ,  $p$ -value = 0.03,  $n = 31$  participants with methylome data at v2; Fig. 2b). Similarly, at v3,

162 PC1 was correlated with days from surgery to v3 ( $r = 0.41$ ,  $p$ -value = 0.04,  $n = 27$  participants  
163 with methylome data at v3). PC1 was not correlated with opioid dose or the number of days  
164 from the last opioid use. From this, we can infer that the longitudinal shift in the methylome is  
165 primarily due to surgery.

166 To profile the CpGs that changed longitudinally over the three visits we performed a mixed  
167 effects ANOVA with visit as a fixed variable and the person ID as random effect (Fig. 2c). The  $p$ -  
168 values for visit showed a significant deviation from the null hypothesis (Fig. 2d histogram).

169 However, only 2 intergenic CpGs (cg05639411 and cg24904009) were above the genome-wide  
170 significant threshold of  $5.0e-8$  (Fig. 2c) and overall, the pattern indicated a modest shift in the  
171 methylome across several CpGs. At a genome-wide suggestive threshold of  $p$ -value =  $1.5e-5$ ,  
172 there were 1701 CpGs that underwent change over the visits (Additional file 1: Table S3). The  
173 majority of these CpGs (>65%) decreased in methylation between v1 and v2, and regained  
174 methylation by v3 such that these sites showed significantly higher levels of methylation at v3  
175 compared to both v1 and v2 (Fig. 2e). Similarly, for the ~35% of CpGs that gained methylation  
176 between v1 and v2, these sites generally declined in methylation by v3 resulting in significantly  
177 lower methylation compared to both v1 and v2 (Fig. 2e). Gene set enrichment analysis (GSEA)  
178 of the 1133 annotated genes represented by the CpGs conveyed mostly an innate immune  
179 inflammatory response (Additional file 1: Table S4). The most overrepresented pathway was  
180 natural killer cell mediated cytotoxicity (KEGG ID hsa04650; normalized enrichment score = -  
181 1.93, FDR = 0.03), and the most overrepresented function was for genes involved in cellular  
182 defense response (GO ID 0006968; normalized enrichment score = -1.83  $p = 0.001$ , FDR = 0.3),  
183 and these immunity-related categories were enriched among the CpGs that decreased in

184 methylation at v2. The opioid receptors were not represented in the list of visit associated  
185 CpGs. Based on these observations, a possible explanation for the shift in the methylome is that  
186 it is the result of surgery-induced immune response and changes in the oral cell composition.  
187 Opioid use, if it had an impact, is likely to exert a weaker signal, and given the limited sample  
188 size, more suitable for a focused candidate gene study.

## 189 **Deconvolution of cellular heterogeneity**

190 To decompose cell types from the composite DNA methylation signal, we applied a reference-  
191 free approach [38]. The bootstrapping method described in Houseman et al. [38] determined  $K$   
192 = 4 cell types (Additional file 1: Table S2). Cell 1, which represented the most abundant cell  
193 type, showed an increase at v2 right after surgery followed by a decline by v3 (Table 2). Aside  
194 from cell 1, no other cell showed significant change over the visits (Table 2). To deduce what  
195 cell types are represented by the 4 groups, we also estimated blood leukocyte proportions  
196 (mainly lymphocytes and granulocytes/neutrophils) using a reference-based approach [39], and  
197 compared correlations between the 4 cell types to the reference-based cell estimates (Table 2;  
198 Additional file 1: Table S2). Cell 1 had a strong positive correlation with granulocytes, and cell 4  
199 had a strong positive correlation with lymphocytes indicating that cells 1 and 4 are chiefly  
200 representative of the leukocyte population in saliva, and serves as a proxy for the increase in  
201 granulocyte proportions after surgery. Cells 2 and 3 had only modest correlations with  
202 leukocyte estimates ( $|r|$  of 0.4–0.5) and may be more representative of the epithelial cells.  
203 The cell estimates were not associated with opioid dose. To evaluate if the baseline  
204 characteristics were related to cellular composition, we tested associations with age, sex, and

205 race/ethnicity. Cell 1 had a significant negative correlation with age ( $r = -0.48$ ,  $p$ -value = 0.006)  
 206 only at v2 that suggests an age-dependent immune response in the days immediately after  
 207 surgery (Fig. 3a). Cell 3 had the strongest association with age at all three visits (Fig. 3b). Cells 2  
 208 and 3 showed extensive cross-sectional variability without longitudinal change, and both were  
 209 significantly associated with race/ethnicity at all three visits, indicating that these could serve as  
 210 proxies for the cellular composition differences between populations (Fig. 3c, 3d). Cell 4 was  
 211 not associated with any of the baseline variables, and sex was not a factor for any of the cell  
 212 types.

213 **Table 2. Reference-free and reference-based estimates of cellular proportions**

| Cell types   | Cell proportions by visit (mean $\pm$ SD) |                 |                 |                            | Pearson $r$ with reference-based estimates |              |
|--------------|-------------------------------------------|-----------------|-----------------|----------------------------|--------------------------------------------|--------------|
|              | Visit 1                                   | Visit 2         | Visit 3         | Visit p-val                | Lymphocytes                                | Granulocytes |
|              | <i>Reference-free estimates</i>           |                 |                 |                            |                                            |              |
| Cell 1       | 0.60 $\pm$ 0.28                           | 0.74 $\pm$ 0.23 | 0.47 $\pm$ 0.32 | $F_{2,86} = 6.6,$<br>0.002 | -0.96                                      | 0.95         |
| Cell 2       | 0.13 $\pm$ 0.13                           | 0.10 $\pm$ 0.10 | 0.17 $\pm$ 0.15 | ns                         | 0.51                                       | -0.47        |
| Cell 3       | 0.21 $\pm$ 0.20                           | 0.12 $\pm$ 0.18 | 0.22 $\pm$ 0.19 | ns                         | 0.43                                       | -0.40        |
| Cell 4       | 0.07 $\pm$ 0.18                           | 0.03 $\pm$ 0.08 | 0.14 $\pm$ 0.23 | $F_{2,86} = 2.7,$<br>0.07  | 0.77                                       | -0.81        |
|              | <i>Reference-based estimates</i>          |                 |                 |                            |                                            |              |
| Granulocytes | 0.71 $\pm$ 0.14                           | 0.77 $\pm$ 0.10 | 0.64 $\pm$ 0.18 | $F_{2,86} = 6.1,$<br>0.003 |                                            |              |
| Lymphocytes  | 0.27 $\pm$ 0.12                           | 0.21 $\pm$ 0.09 | 0.33 $\pm$ 0.15 | $F_{2,86} = 6.6,$<br>0.002 |                                            |              |

214

## 215 **Effect of opioid dose on *OPRM1* promoter methylation**

216 To examine if higher opioid dose is related to higher promoter methylation, we started with a  
 217 candidate gene approach and focused on the CpGs located in the *OPRM1* promoter. In total, 10  
 218 promoter CpGs were targeted by the Illumina probes and these encompassed the CpG island  
 219 described by Nielsen et al. and replicated by Chorbov et al. [29, 30] (Fig. 4a; Table 3; individual

220 level  $\beta$ -values in Additional file 1: Table S2). We first applied a mixed regression model with  
221 opioid dosage group and visit as fixed categorical variables, and each participant ID as random  
222 intercept. With the exception of the last CpG, the regression estimates for all the *OPRM1*  
223 promoter CpGs were positive, with higher methylation levels for the two higher dosage groups  
224 (i.e., 25-90 MME and  $\geq 90$  MME) relative to the lowest dosage group (<25 MME) (Table 3). At a  
225 nominal p-value of 0.05, 4 CpGs were significantly associated with opioid dosage groups. The  
226 ANOVA plots for these CpGs showed that the difference between dosage groups was  
227 pronounced at v3 (for CpG1, CpG2, CpG6) and v2 (for CpG7) but not at v1 (Fig. 4a). As tobacco  
228 use was associated with higher self-administered dosage of opioids, we considered it as a  
229 potential contributing factor. However, including past tobacco use in the regression model did  
230 not alter the results, and this indicated that the higher methylation at the *OPRM1* CpGs is a  
231 specific effect of opioids.

232 To check whether the association with opioid dosage can be robustly detected, we summarized  
233 the overall methylation pattern in the promoter by taking the mean DNA methylation  $\beta$ -values  
234 for the nine CpGs that were positively associated with opioid dosage (CpG1 to CpG9). We  
235 applied a linear regression model and tested whether higher mean methylation was associated  
236 with either higher MME or longer length of opioid use. This analysis was done for the three  
237 visits separately and adjusted for age, tobacco use, and cellular heterogeneity. Both MME and  
238 length of opioid use were associated with higher mean methylation, but this effect was  
239 significant only at v3, further indicating that the hypermethylation of the *OPRM1* receptor is  
240 more likely a response rather than a predisposing factor (Fig. 4b; Table 4). Our results are  
241 consistent with the opioid associated hypermethylation and indicates that even a relatively

242 short-term opioid use may induce an increase in methylation that is proportional to dosage at  
 243 the *OPRM1* promoter.

244

245 **Table 3. Dose dependent methylation of individual *OPRM1* promoter CpGs**

| CpG   | ProbeID    | <25 MME vs. 25–90 MME <sup>1</sup> |       | <25 MME vs. ≥90 MME <sup>1</sup> |       | Dosage anova <sup>2</sup> |             |
|-------|------------|------------------------------------|-------|----------------------------------|-------|---------------------------|-------------|
|       |            | Coef                               | t-val | Coef                             | t-val | F <sub>2,29</sub>         | p           |
| CpG1  | cg22370006 | 0.041                              | 2.66  | 0.023                            | 1.39  | 3.53                      | <b>0.04</b> |
| CpG2  | cg14262937 | 0.051                              | 2.77  | 0.014                            | 0.69  | 4.20                      | <b>0.02</b> |
| CpG3  | cg06649410 | 0.047                              | 1.65  | 0.010                            | 0.31  | 1.56                      | 0.23        |
| CpG4  | cg23143142 | 0.018                              | 1.56  | 0.000                            | -0.04 | 1.71                      | 0.20        |
| CpG5  | cg23706388 | 0.010                              | 0.76  | 0.006                            | 0.38  | 0.29                      | 0.75        |
| CpG6  | cg05215925 | 0.019                              | 2.73  | 0.012                            | 1.59  | 3.74                      | <b>0.04</b> |
| CpG7  | cg14348757 | 0.042                              | 2.78  | 0.019                            | 1.16  | 3.92                      | <b>0.03</b> |
| CpG8  | cg12838303 | 0.026                              | 2.08  | 0.022                            | 1.64  | 2.38                      | 0.11        |
| CpG9  | cg22719623 | 0.006                              | 0.52  | 0.004                            | 0.33  | 0.14                      | 0.87        |
| CpG10 | cg15085086 | -0.029                             | -0.94 | -0.040                           | -1.19 | 0.78                      | 0.47        |

246 <sup>1</sup>Regression estimates for higher dose groups (25–90 MME and ≥90 MME) relative to lowest dose group (<25  
 247 MME) based on linear mixed effects model: lmer(CpG ~ dose + visit + (1|ID))

248 <sup>2</sup>Two-tailed p-values for the main effect of dosage groups

249

250 **Table 4. Mean methylation in the *OPRM1* promoter and association with opioid dose and  
 251 days of use**

|                                   | MME dosage effect Visit 3 <sup>2</sup> |       |              | Days of opioid use effect Visit 3 <sup>2</sup> |       |              |
|-----------------------------------|----------------------------------------|-------|--------------|------------------------------------------------|-------|--------------|
|                                   | Coef                                   | t-val | p (1-tailed) | Coef                                           | t-val | p (1-tailed) |
| Promoter methylation <sup>1</sup> | 0.0002                                 | 2.16  | 0.02         | 0.003                                          | 3.40  | 0.001        |

252 <sup>1</sup>*OPRM1* promoter methylation summarize by averaging the β-values for CpG1 to CpG9

253 <sup>2</sup>Linear regression at visit 3, one-tailed p-value to test hypermethylation with higher cumulative MME or longer  
 254 duration of use

## 255 Preliminary epigenome-wide association study for opioid dose

256 Since the candidate gene approach indicated that the short-term use of prescribed opioids can  
 257 have an impact on CpG methylation, we expanded the analysis to an EWAS using the same  
 258 mixed model to test association with opioid dosage. A CpG (cg08105965) located in the

259 promoter CpG island of the GTPase signaling gene, *RASL10A* (RAS like family 10 member A), was  
260 genome-wide significant (p-value of 5.0e-8; Fig. 5a). Unlike the pattern for the *OPRM1*  
261 promoter, the lowest dose group had significantly lower methylation level at both visits 1 and  
262 3, indicating that the difference preceded opioid use (Fig. 5b). In addition to the *RASL10A*  
263 promoter CpG, 5 other CpG sites were associated with opioid dosage at the suggestive  
264 threshold (p-value of 1.0e-5; Fig. 5c–g). For most of these, the methylation differences were  
265 apparent at v1 and preceded opioid use. For these top CpGs, adjusting for past tobacco use did  
266 not alter the results, and none of these sites were significantly associated with tobacco use. To  
267 explore if any of the CpGs that were above the suggestive threshold have been previously  
268 implicated in opioid use or dependence, we referred to recent human EWAS for opioid  
269 dependence [24], and methadone treatment dosage [28]. Based on comparison of probe IDs  
270 and genes, none of the CpGs we report here have been previously linked to opioid related  
271 traits.

272 While this is preliminary results from a small study cohort and is yet to be replicated, we  
273 provide the list of 64 CpGs that were associated with opioid dosage at a nominal uncorrected p-  
274 value of 1.0e-4, along with the gene ontology IDs and KEGG pathways for the corresponding  
275 genes in Additional file 1: Table S5.

## 276 **Discussion**

277 Here we report results from a longitudinal study of DNA methylation in a cohort of opioid naïve  
278 dental patients who received prescription opioids following oral surgery. To summarize the  
279 main result, we found increased methylation at the *OPRM1* promoter associated with higher

280 cumulative opioid dose. This replicates the hypermethylated profile among long-term opioid  
281 users and alcohol dependent individuals [23, 29-34]. The pattern of methylation we observed  
282 indicates that the increase in methylation is more likely the response to, rather than the cause  
283 of, opioid use [20]. The present study provides evidence that such epigenetic modifications are  
284 induced within the early days of drug use and may represent early epigenomic responses to an  
285 addictive substance.

286 A peculiar challenge we faced was that the site of sample collection was also the site of surgery.  
287 Saliva has a highly heterogeneous cellular makeup and is estimated to constitute about ~45%  
288 epithelial cells, and about ~55% leukocytes from circulating blood [40]. The main goal of the  
289 study was to detect the effect of short-term and comparatively low-dose opioids, while  
290 accounting for the larger perturbation caused by surgery. Although we do not have details on  
291 the severity of the oral surgery, most were third molar extractions and were relatively minor  
292 and non-invasive. Nonetheless, the patients would have experienced an injury-induced  
293 inflammatory response that can result in changes in numbers of circulating immune cells [41],  
294 and consequently, changes in oral cell composition. As DNA methylation is highly cell-type  
295 specific, the heterogeneity in cells will be a major source of “noise” in the methylome data [39,  
296 42-44]. The longitudinal variability in DNA methylation that was captured by the top PC can  
297 therefore be attributed to cell composition rather than opioid use. We could deduce this by the  
298 significant correlation between PC1 and the number of days from surgery to the follow-up  
299 visits. We were able to partly resolve the cell heterogeneity by applying reference-free and  
300 reference-based estimates of cell proportions. The reference-free method estimated four major  
301 cell types. Although saliva is highly heterogeneous, and certainly has more than just 4 types of



302 cells [40], the classification into 4 broad groups likely reflects the limitation in the *in-silico*  
303 approach to resolve finer differences between cellular subtypes. Cell 1 most likely represented  
304 the granulocyte population (chiefly neutrophils), which constitutes the most abundant  
305 leukocyte subtype in circulating blood, and is responsible for innate immunity and acute  
306 inflammatory response. Consistent with the known increase in granulocyte-to-lymphocyte ratio  
307 in the few days following surgery [45], we also found an increase in cell 1 and in relative  
308 abundance of granulocytes compared to lymphocytes at visit 2. This was followed by a  
309 compensatory decrease in granulocyte proportions by visit 3. Cell 2 and cell 3 are presumed to  
310 represent a portion of the epithelial cell population, and these showed no significant within-  
311 individual changes over the visits. However, these cells exhibited significant association with  
312 age and self-reported race/ethnicity. Although cell type decomposition was not the primary  
313 objective of the study, our analyses demonstrated that the saliva methylome can be highly  
314 informative of individual differences in perioperative immune profiles.

315 For the effect of postsurgical opioid use, we first focused on the *OPRM1* promoter region as an  
316 epigenetic sensor of opioid dose. The CpG-rich promoter harbors a CpG island and several  
317 studies in different populations have demonstrated higher DNA methylation at this site among  
318 opioid users and methadone-maintained heroin addicts [23, 29-33]. The increased methylation  
319 of the *OPRM1* promoter is not only limited to OUD but has also been detected among  
320 individuals with alcohol dependence, suggesting that the hypermethylation is generally  
321 associated with substance use disorder and addiction [34]. A question has been whether such  
322 epigenetic differences are the result of drug use or the cause of increased vulnerability to  
323 addiction [20]. To address this, we interrogated 10 CpGs in a 550 bp region that encompassed

324 the promoter CpG island investigated by Nielson et al. and Chorbov et al. (the CpG island is  
325 depicted in Fig. 4) [29, 30]. With the exception of the last CpG, the remaining 9 CpGs showed  
326 higher methylation in the two higher-dose groups relative to the low-dose group, and four of  
327 these CpGs were significantly associated with dosage at nominal alpha of 0.05. Comparison of  
328 mean methylation differences between the dosage groups across the three visits indicated that  
329 higher methylation in the higher dose groups is more apparent at the postsurgery visits,  
330 particularly visit 3. The positive association between the mean promoter methylation and  
331 cumulative MME, and mean promoter methylation and days of opioid use, were also significant  
332 only at visit 3. The heightened inflammatory state at visit 2, which occurred within a few days of  
333 surgery, may have been the reason why the more subtle effect of opioids was not significant at  
334 visit 2, and the positive association emerged only at visit 3.

335 The *OPRM1* locus presents a prime site for gene x environment interaction, a critical aspect of  
336 addiction since the addictive substance is an environmental agent that has a long-lasting  
337 biological effect. The *OPRM1* gene has been the subject of several candidate gene studies for  
338 addiction. Much attention has been paid to the missense SNP that alters the *OPRM1* protein  
339 function, although its impact on addiction traits and OUD is somewhat ambiguous [46, 47].  
340 Several studies have also identified non-coding variants in the *OPRM1* locus that alters DNA  
341 methylation and gene expression [33, 35, 48]. At least one genome-wide association study has  
342 also identified a genome-wide significant association between a SNP upstream of *OPRM1* and  
343 methadone-maintenance dosing [37]. These studies collectively provide evidence that common  
344 genetic variants in the proximal region of *OPRM1* affect DNA methylation and gene expression,  
345 and could have a downstream impact on opioid response that could potentially influence

346 vulnerability to addiction. Our present work was carried out in a small sample size and our  
347 primary goal was to track the within-individual trajectory across visits. If there were genetically  
348 modulated small cross-sectional differences at baseline, this sample size would be  
349 underpowered to detect the differences, and the significant association with opioid dose that  
350 we found may have been the result of opioid-induced augmentation of differential methylation  
351 at the postoperative visits.

352 The hypermethylation of the *OPRM1* promoter is likely only a small part of a larger network of  
353 genes involved in the cellular response to drug exposure. We therefore followed up with a  
354 preliminary EWAS exploration to identify other CpGs that may be associated with opioid self-  
355 administration. To our surprise, despite the small sample size, one CpG, located in the promoter  
356 region of *RASL10A*, a Ras-related GTPase signaling gene, was genome-wide significant. Perhaps  
357 this is due to the power of the longitudinal design in capturing differentially methylated sites  
358 that are significantly different between dosage groups at more than one visit. For instance, the  
359 differential methylation of cg08105965 at *RASL10A* is apparent at both visits 1 and 3. Although  
360 *RASL10A* has not been previously implicated in opioid response or addiction, it is notable that  
361 the *OPRM1* protein is a G-protein coupled receptor, and its activation results in cellular  
362 signaling cascades that also involve Ras GTPase activity [49-51]. In addition to the *RASL10A* CpG,  
363 five other CpGs were at or above the suggestive threshold, including sites located in *AFF1*,  
364 *VSNL1*, *ANXA2*, and *PAIP2*. To our knowledge, DNA methylation at these genes have not been  
365 previously linked to opioid use or dependence. However, one recent study of gene expression  
366 in the rat model has shown an upregulation of *RASL10A* and *VSNL1* in the brain following acute  
367 morphine treatment [52]. Similar to *RASL10A*, *VSNL1* (visinin-like 1) also codes for an

368 intracellular signaling molecule with high expression in the brain [53]. The list of CpGs that were  
369 associated with opioid dosage at a nominal uncorrected p-value < 0.0001 included few other  
370 cellular signaling genes (e.g., *ANXA2*, *RET*, *ADRB1*). Taken together, the EWAS results hint that  
371 epigenetic modulation of genes involved in intracellular signal transduction may play a role  
372 during the early phase of opioid use.

373 We must emphasize that the small sample size and the heterogeneity in methylome signal,  
374 partly due to cell composition and partly due to the heterogenous population group, are major  
375 limitations, and the EWAS results await replication in an independent cohort. The CpGs  
376 identified by the present EWAS were differentially methylated even at v1, prior to opioid use,  
377 and this suggests that there may be genetic variants underlying these epigenetic differences.  
378 However, such potential effects of genetic variation is not addressed in the present study due  
379 to the lack of genotype data. Another weakness that we should note is that the main variable of  
380 interest, therapeutic opioid dosing, was based on patient self-reports rather than objective  
381 measures of drug use [54]. A future strategy would be to use existing technologies such as  
382 wearable devices that can provide additional means of tracking the physiological responses to  
383 opioids [55]. The present study also does not address whether these epigenetic changes linger  
384 or diminish over time in the absence of continued drug use. A more comprehensive longitudinal  
385 epigenomic study of the early effects of prescription opioids that also integrates genetic effects,  
386 and with a longer follow-up period would be the next phase of study.

387 Regarding the potential for epigenetic persistence, we must point out that any peripheral tissue  
388 serves only as a proxy for the possible epigenetic changes in the brain. A distinction is that  
389 blood and epithelium are mitotically active tissues and cells are renewed within a few days to a

390 few weeks, with the exception of long-lived memory T-cells. For methylation signals to persist,  
391 it will require either continued presence of the perturbation (i.e., continued exposure to  
392 opioids), or methylation changes in mitotically active stem cells that can be faithfully  
393 transmitted to daughter cells. The brain, on the other hand, is mitotically inactive and consists  
394 of mostly terminally differentiated cells that last a lifetime. If the relatively modest dose and  
395 short-term use of prescription opioids has a similar impact in brain cells, the effects may not  
396 readily decay and may be long lasting in the central nervous system.

## 397 **Conclusion**

398 In conclusion, our study replicates the hypermethylation of the *OPRM1* promoter with opioid  
399 use. Previous studies reported on the effects of chronic opioid use; here we provide evidence  
400 that the epigenetic restructuring begins within the initial stage of opioid exposure. The present  
401 findings on the acute effects of prescription opioids, as well as the CpGs that may be predictive  
402 of opioid dosing, require further replication with a well-powered and more comprehensive  
403 study in a larger cohort.

## 404 **Methods**

### 405 **Participants**

406 Eligible participants were scheduled for tooth extractions, mostly third molar extractions, at an  
407 oral and maxillofacial surgery clinic that were typically followed by postoperative prescriptions  
408 of hydrocodone/acetaminophen (7.5/325 mg q4-6h prn pain) or oxycodone/acetaminophen  
409 (5mg/325mg q6h prn pain). For inclusion in the study, individuals were required to be 18 years  
410 of age or older, opioid naïve, able to consent, able to understand and speak English, and willing

411 to provide saliva samples. Individuals were excluded if they reported previous use of opioids,  
412 had current substance use dependence, were pregnant, were incarcerated, had other causes of  
413 pain, were unable to consent, or had a developmental disability that prevented participation.  
414 The study received approval by the university Institutional Review Board. Eligible participants  
415 were provided a summary of the consent form by the study coordinator and allowed to read  
416 and ask questions before enrollment. All participants provided written informed consent.  
417 Forty-one individuals consented to the study and provided contact information and responded  
418 to a demographic questionnaire. The enrolled participants also provided information on  
419 existing diagnosed diseases, and were assessed for casual substance use within the past 12  
420 months (tobacco, marijuana, cocaine, psychedelics, other hard drugs; details in Additional file 1:  
421 Table S1). The clinical staff provided routine opioid medication and recovery instructions for all  
422 participants right after surgery. The opioids prescribed to participants were Hydrocodone,  
423 Oxycodone, and Codeine in doses that varied between 5mg to 30mg (Table 1). The study  
424 coordinator also provided opioid medication logs to participants to record self-administration  
425 including the date, time, individual dose per opioid pill, and number of opioid pills taken. For  
426 the 33 participants who received opioid medication, only one participant (person ID 142)  
427 reported no opioid usage.

#### 428 **Sample processing and DNA methylation assay**

429 Saliva was collected using the Oragene DNA sample collection kit (OGR 500) by DNA Genotek  
430 (<http://www.dnagenotek.com>). The first set of samples was collected before surgery. The  
431 second saliva sample was collected a few days after opioid discontinuation, and the third was  
432 collected on a follow-up visit (Fig. 1; Table 1). DNA was purified using the DNA Genotek PrepIT

433 L2P kit according to manufacturer's instruction. Genome-wide DNA methylation was assayed  
434 on the Illumina Infinium Human MethylationEPIC BeadChips following the manufacturer's  
435 standard protocol at the HudsonAlpha Genomic Services Lab (<https://gsl.hudsonalpha.org>).

#### 436 **Data processing**

437 Raw intensity IDAT files were loaded to R and all quality checks, data preprocessing, and  
438 normalization were carried out using the R package, minfi (v.1.31) [56]. Methylation levels were  
439 estimated as  $\beta$ -values (ratio of methylated by unmethylated probes) and quantile normalized.  
440 The initial QC involved comparison between the log median intensities of methylated and  
441 unmethylated channels, and the density plots for  $\beta$ -values (Additional file 2: Fig. S1a). All  
442 samples passed these checks. Sex estimated from the DNA methylation data also matched the  
443 self-reported sex. To retain only high-quality data, probes with detection p-value > 0.01 (14,676  
444 probes) were excluded. Probes that target CpGs on the sex chromosomes were also removed  
445 (18,605 probes). Finally, a total of 96,146 probes that overlapped annotated SNPs and/or were  
446 flagged for poor mapping quality (MASK.general list from [57]) were also filtered out. A total of  
447 736,432 high quality probes were retained and used for downstream analysis.

448 As further QC, we performed unsupervised hierarchical clustering using the full set of high-  
449 quality probes (Additional file 2: Fig. S1b). While samples longitudinally collected from the same  
450 individual tended to cluster together, there were also several samples that did not cluster with  
451 self. To check for possible errors in sample labeling, we repeated the cluster analysis using a  
452 subset of 30,435 probes that had been filtered out due to overlap with common SNPs. While  
453 these were deemed poor-quality probes and unfit for differential methylation analysis, in terms

454 of sample identity check, these probes can serve as proxy genotype markers that can help verify  
455 if samples came from the same person. Using this set, almost all samples collected from the  
456 same participant clustered with self, and for the most part, the clusters also aligned with self-  
457 reported race/ethnicity groups (Additional file 2: Fig. S1c). Only one of the 33 participant who  
458 received prescription opioids (person ID 108) did not pair with self and data from this person  
459 were excluded from all downstream analysis.

#### 460 **Estimation of cellular proportions**

461 To infer the relative proportions of the major cell types, we first implemented a reference-free  
462 deconvolution of the methylome data using the R package RefFreeEWAS (v2.2) [58]. The  
463 RefFreeEWAS algorithm applies a non-negative matrix factorization to decompose a matrix  $Y =$   
464  $M\Omega$ , where  $M$  represents an  $m \times K$  matrix with  $m$  as CpG specific methylation for an unknown  
465 number of  $K$  cell types, and  $\Omega$  as the cell-type proportion constrained to sum to a value  $\leq 1$ . For  
466 computational efficiency, the  $K$  cell types has to be first specified, and as described in  
467 Houseman et al. [58], we set the  $K$  to vary from 2 to 10 cell types and decomposed the  $Y = M\Omega$ .  
468 Following this, we applied bootstrapping to estimate the optimal  $K$  value. For this estimation,  
469 we applied 10 iterations with replacement every 1000 times. The optimal  $K = 4$  was selected  
470 based on the minimum value of the average of bootstrapped deviances for each putative cell  
471 type. While this method provides the relative proportions of cell types, the identity of the four  
472 cells are unknown. Since a significant proportion of saliva consists of leukocytes, we also  
473 applied a reference-based approach to estimate the relative proportions of lymphocytes and  
474 neutrophils [39, 42, 43]. To infer the putative identities of cells, we performed Pearson  
475 correlations between the  $K$  cells and the proportions of leukocyte types.



## 476 **Statistical analyses**

477 For the global analysis, PCA was done on the full set of 736,432 probes using the prcomp  
478 function in R. In order to evaluate which variable had the most significant association with PC1,  
479 we examined the association between PC1 and the following variables: sex, age, self-reported  
480 race/ethnicity, presence or absence of other diseases, tobacco or marijuana usage in the past  
481 12 months, and opioid dose, days from surgery to sample collection, and days from last opioid  
482 dose to sample collection. We used ANOVA for categorical variables, and Pearson correlation  
483 for continuous variables; and these tests were conducted separately for the three visits. We  
484 also performed similar analyses for estimated cell proportions to examine whether the  
485 variables were significantly related to the cell proportions. PC1 and the cell proportions were  
486 also related to visit using ANOVA. Since visit was the most significant explanatory variable for  
487 PC1, we identified the CpGs that showed longitudinal change over the three visits by applying a  
488 mixed-effects ANOVA:  $\text{aov}(\beta\text{-value} \sim \text{visit} + \text{Error}(\text{ID}/\text{visit}))$ . This epigenome-wide analysis was  
489 done for the 26 participants with data from all 3 visits. For the set of genome-wide suggestive  
490 CpGs that changed over the visits (uncorrected  $p\text{-value} \leq 10^{-5}$ ), GSEA was implemented on the  
491 WebGestalt platform (<http://www.webgestalt.org>) with each CpG ranked by the mean  $\beta\text{-value}$   
492 difference between v2 and v1.

493 For candidate gene analysis, we surveyed the promoter region of *OPRM1*. The CpG island that  
494 was interrogated by Nielson et al., and Chorbov et al. is located at 154360587–154360922 bp of  
495 chromosome 6 (GRCh37/hg19) [29, 30]. Within that exact coordinate, our data only had 4 CpG  
496 probes. We therefore considered a slightly wider region (550 bp) and in total, the array data  
497 contained 10 probes that targeted promoter CpGs at chr6:154360344-154360894 bp. To

498 evaluate methylation at individual CpGs, we applied a linear mixed-effects model with dosage  
499 group and visit as fixed categorical variables, and person ID as random intercept:  $\text{lmer}(\beta\text{-value} \sim$   
500  $\text{dosage} + \text{visit} + (1 | \text{ID}))$ . To test if history of tobacco use could account for some of the effects,  
501 we repeated the test with the model:  $\text{lmer}(\beta\text{-value} \sim \text{MME} + \text{tobacco-use} + \text{visit} + (1 | \text{ID}))$ . This  
502 was done using the “lmerTest” R package, and to get the p-values for the main effect of dosage  
503 groups, the degrees of freedom were computed by the Satterthwaite’s method [59, 60].  
504 Following the CpG level analysis, we estimated the general methylation trend for the promoter  
505 by averaging the  $\beta$ -values for the 9 CpGs that had a positive regression coefficient with the  
506 dosage groups. We then tested the association between the promoter mean methylation score,  
507 and two opioid-related continuous variables: length of opioid use in days, and cumulative MME.  
508 This analysis was done for the three visits separately, and adjusted for age and cellular  
509 heterogeneity using the equations  $\text{lm}(\text{mean-}\beta \sim \text{MME} + \text{tobacco-use} + \text{age} + \text{cell1} + \text{cell2} +$   
510  $\text{cell3})$ , and  $\text{lm}(\text{mean-}\beta \sim \text{days-of-use} + \text{tobacco-use} + \text{age} + \text{cell1} + \text{cell2} + \text{cell3})$ .  
511 Following the candidate gene study, we then performed an EWAS for opioid dosage using the  
512 same mixed-effect model:  $\text{lmer}(\beta\text{-value} \sim \text{MME} + \text{visit} + (1 | \text{ID}))$ ; and for the CpGs identified by  
513 the EWAS at above the genome-wide suggestive threshold, we checked for the effect of past  
514 tobacco use using the model:  $\text{lmer}(\beta\text{-value} \sim \text{MME} + \text{tobacco-use} + \text{visit} + (1 | \text{ID}))$ .

## 515 **List of Abbreviations**

516 EWAS: Epigenome-wide association study

517 FDR: False discovery rate

518 GO: Gene ontology

519 GSEA: Gene Set Enrichment Analysis

520 KEGG: Kyoto encyclopedia of genes and genomes

521 MME: Morphine milligram equivalent

522 OPRM1: Opioid receptor mu 1

523 OUD: Opioid use disorder

524 PC: Principal component

525 PCA: Principal component analysis

526 QC: Quality control

527 SNP: Single nucleotide polymorphism

## 528 **Declarations**

529 **Ethics approval and consent to participate:** All participants provided written informed consent  
530 and study received IRB approval.

531 **Consent for publication:** Not applicable

532 **Availability of Data.** The full de-identified raw DNA methylation data will be made available  
533 from the NCBI NIH Gene Expression Omnibus repository upon official publication.

534 **Competing interests:** We have no financial or non-financial conflicts of interest.

535 **Funding:** Funded by the University of Tennessee Health Science Center CORNET Clinical Awards

536 **Author contributions:** JVSS: performed lab work and data analysis and contributed to  
537 manuscript; FISG: contributed to data analysis; JHB: identified suitable patients and facilitated

538 participant recruitment at the dental clinic; KJD: contributed to study conception and design;  
539 KM: contributed to study conception, design and data analysis, and wrote the manuscript. All  
540 authors contributed to and approved the final version of the manuscript.

#### 541 **Acknowledgements**

542 We thank the UTHSC Office of Research and the CORNET Awards for supporting this project.

## 543 References

- 544 1. Porter J, Jick H: **Addiction rare in patients treated with narcotics.** *N Engl J Med* 1980,  
545 **302(2):123.**
- 546 2. Rummans TA, Burton MC, Dawson NL: **How Good Intentions Contributed to Bad**  
547 **Outcomes: The Opioid Crisis.** *Mayo Clin Proc* 2018, **93(3):344-350.**
- 548 3. Administration SAaMHS: **Results from the 2017 National Survey on Drug Use and**  
549 **Health:**  
550 **Detailed Tables.** 2017.
- 551 4. **Understanding the Epidemic**  
552 [<https://www.cdc.gov/drugoverdose/epidemic/index.html>]
- 553 5. Edlund MJ, Martin BC, Russo JE, DeVries A, Braden JB, Sullivan MD: **The role of opioid**  
554 **prescription in incident opioid abuse and dependence among individuals with chronic**  
555 **noncancer pain: the role of opioid prescription.** *Clin J Pain* 2014, **30(7):557-564.**
- 556 6. National Academies of Sciences E, and Medicine.: **Pain management and the opioid**  
557 **epidemic: Balancing societal and individual benefits and risks of prescription opioid**  
558 **use.** Washington, DC: The National Academies Press; 2017.
- 559 7. Schroeder AR, Dehghan M, Newman TB, Bentley JP, Park KT: **Association of Opioid**  
560 **Prescriptions From Dental Clinicians for US Adolescents and Young Adults With**  
561 **Subsequent Opioid Use and Abuse.** *JAMA Intern Med* 2019, **179(2):145-152.**
- 562 8. Shah A, Hayes CJ, Martin BC: **Characteristics of Initial Prescription Episodes and**  
563 **Likelihood of Long-Term Opioid Use — United States, 2006–**  
564 **2015.** *Mmwr-Morbid Mortal W* 2017, **66(10):265–269.**
- 565 9. Denisco RC, Kenna GA, O'Neil MG, Kulich RJ, Moore PA, Kane WT, Mehta NR, Hersh EV,  
566 Katz NP: **Prevention of prescription opioid abuse The role of the dentist.** *J Am Dent*  
567 *Assoc* 2011, **142(7):800-810.**
- 568 10. Rasubala L, Pernapati L, Velasquez X, Burk J, Ren YF: **Impact of a Mandatory**  
569 **Prescription Drug Monitoring Program on Prescription of Opioid Analgesics by**  
570 **Dentists.** *PLoS One* 2015, **10(8):e0135957.**
- 571 11. Tong ST, Hochheimer CJ, Brooks EM, Sabo RT, Jiang V, Day T, Rozman JS, Kashiri PL, Krist  
572 AH: **Chronic Opioid Prescribing in Primary Care: Factors and Perspectives.** *Ann Fam*  
573 *Med* 2019, **17(3):200-206.**
- 574 12. Alam A, Gomes T, Zheng H, Mamdani MM, Juurlink DN, Bell CM: **Long-term analgesic**  
575 **use after low-risk surgery: a retrospective cohort study.** *Arch Intern Med* 2012,  
576 **172(5):425-430.**
- 577 13. Brummett CM, Waljee JF, Goesling J, Moser S, Lin P, Englesbe MJ, Bohnert ASB,  
578 Kheterpal S, Nallamothu BK: **New Persistent Opioid Use After Minor and Major Surgical**  
579 **Procedures in US Adults.** *JAMA Surg* 2017, **152(6):e170504.**
- 580 14. Cicero TJ, Ellis MS, Surratt HL, Kurtz SP: **The changing face of heroin use in the United**  
581 **States: a retrospective analysis of the past 50 years.** *JAMA Psychiatry* 2014, **71(7):821-**  
582 **826.**

- 583 15. Sun EC, Darnall BD, Baker LC, Mackey S: **Incidence of and Risk Factors for Chronic**  
584 **Opioid Use Among Opioid-Naive Patients in the Postoperative Period.** *JAMA Intern*  
585 *Med* 2016, **176**(9):1286-1293.
- 586 16. Nestler EJ: **Epigenetic mechanisms of drug addiction.** *Neuropharmacology* 2014, **76 Pt**  
587 **B**:259-268.
- 588 17. Browne CJ, Godino A, Sallery M, Nestler EJ: **Epigenetic Mechanisms of Opioid Addiction.**  
589 *Biological psychiatry* 2020, **87**(1):22-33.
- 590 18. Flagel SB, Chaudhury S, Waselus M, Kelly R, Sewani S, Clinton SM, Thompson RC,  
591 Watson SJ, Jr., Akil H: **Genetic background and epigenetic modifications in the core of**  
592 **the nucleus accumbens predict addiction-like behavior in a rat model.** *Proceedings of*  
593 *the National Academy of Sciences of the United States of America* 2016, **113**(20):E2861-  
594 2870.
- 595 19. Koo JW, Mazei-Robison MS, LaPlant Q, Egervari G, Braunscheidel KM, Adank DN,  
596 Ferguson D, Feng J, Sun H, Scobie KN *et al*: **Epigenetic basis of opiate suppression of**  
597 **Bdnf gene expression in the ventral tegmental area.** *Nature neuroscience* 2015,  
598 **18**(3):415-422.
- 599 20. Nielsen DA, Utrankar A, Reyes JA, Simons DD, Kosten TR: **Epigenetics of drug abuse:**  
600 **predisposition or response.** *Pharmacogenomics* 2012, **13**(10):1149-1160.
- 601 21. Kozlenkov A, Jaffe AE, Timashpolsky A, Apontes P, Rudchenko S, Barbu M, Byne W, Hurd  
602 YL, Horvath S, Dracheva S: **DNA Methylation Profiling of Human Prefrontal Cortex**  
603 **Neurons in Heroin Users Shows Significant Difference between Genomic Contexts of**  
604 **Hyper- and Hypomethylation and a Younger Epigenetic Age.** *Genes* 2017, **8**(6).
- 605 22. Egervari G, Landry J, Callens J, Fullard JF, Roussos P, Keller E, Hurd YL: **Striatal H3K27**  
606 **Acetylation Linked to Glutamatergic Gene Dysregulation in Human Heroin Abusers**  
607 **Holds Promise as Therapeutic Target.** *Biological psychiatry* 2017, **81**(7):585-594.
- 608 23. Doehring A, Oertel BG, Sittl R, Lotsch J: **Chronic opioid use is associated with increased**  
609 **DNA methylation correlating with increased clinical pain.** *Pain* 2013, **154**(1):15-23.
- 610 24. Montalvo-Ortiz JL, Cheng Z, Kranzler HR, Zhang H, Gelernter J: **Genomewide Study of**  
611 **Epigenetic Biomarkers of Opioid Dependence in European- American Women.** *Sci Rep*  
612 2019, **9**(1):4660.
- 613 25. Bleich S, Lenz B, Ziegenbein M, Beutler S, Frieling H, Kornhuber J, Bonsch D: **Epigenetic**  
614 **DNA hypermethylation of the HERP gene promoter induces down-regulation of its**  
615 **mRNA expression in patients with alcohol dependence.** *Alcohol Clin Exp Res* 2006,  
616 **30**(4):587-591.
- 617 26. Bonsch D, Lenz B, Reulbach U, Kornhuber J, Bleich S: **Homocysteine associated genomic**  
618 **DNA hypermethylation in patients with chronic alcoholism.** *J Neural Transm (Vienna)*  
619 2004, **111**(12):1611-1616.
- 620 27. Knothe C, Doehring A, Ultsch A, Lotsch J: **Methadone induces hypermethylation of**  
621 **human DNA.** *Epigenomics* 2016, **8**(2):167-179.
- 622 28. Marie-Claire C, Crettol S, Cagnard N, Bloch V, Mouly S, Laplanche JL, Bellivier F, Lepine  
623 JP, Eap C, Vorspan F: **Variability of response to methadone: genome-wide DNA**  
624 **methylation analysis in two independent cohorts.** *Epigenomics* 2016, **8**(2):181-195.

- 625 29. Chorbov VM, Todorov AA, Lynskey MT, Cicero TJ: **Elevated levels of DNA methylation at**  
626 **the OPRM1 promoter in blood and sperm from male opioid addicts.** *Journal of opioid*  
627 *management* 2011, **7**(4):258-264.
- 628 30. Nielsen DA, Yuferov V, Hamon S, Jackson C, Ho A, Ott J, Kreek MJ: **Increased OPRM1**  
629 **DNA methylation in lymphocytes of methadone-maintained former heroin addicts.**  
630 *Neuropsychopharmacology : official publication of the American College of*  
631 *Neuropsychopharmacology* 2009, **34**(4):867-873.
- 632 31. Ebrahimi G, Asadikaram G, Akbari H, Nematollahi MH, Abolhassani M, Shahabinejad G,  
633 Khodadadnejad L, Hashemi M: **Elevated levels of DNA methylation at the OPRM1**  
634 **promoter region in men with opioid use disorder.** *The American journal of drug and*  
635 *alcohol abuse* 2018, **44**(2):193-199.
- 636 32. Nielsen DA, Hamon S, Yuferov V, Jackson C, Ho A, Ott J, Kreek MJ: **Ethnic diversity of**  
637 **DNA methylation in the OPRM1 promoter region in lymphocytes of heroin addicts.**  
638 *Hum Genet* 2010, **127**(6):639-649.
- 639 33. Yuferov V, Levran O, Proudnikov D, Nielsen DA, Kreek MJ: **Search for genetic markers**  
640 **and functional variants involved in the development of opiate and cocaine addiction**  
641 **and treatment.** *Ann N Y Acad Sci* 2010, **1187**:184-207.
- 642 34. Zhang H, Herman AI, Kranzler HR, Anton RF, Simen AA, Gelernter J: **Hypermethylation of**  
643 **OPRM1 promoter region in European Americans with alcohol dependence.** *J Hum*  
644 *Genet* 2012, **57**(10):670-675.
- 645 35. Hancock DB, Levy JL, Gaddis NC, Glasheen C, Saccone NL, Page GP, Hulse GK,  
646 Wildenauer D, Kelty EA, Schwab SG *et al*: **Cis-Expression Quantitative Trait Loci**  
647 **Mapping Reveals Replicable Associations with Heroin Addiction in OPRM1.** *Biological*  
648 *psychiatry* 2015, **78**(7):474-484.
- 649 36. LaForge KS, Yuferov V, Kreek MJ: **Opioid receptor and peptide gene polymorphisms:**  
650 **potential implications for addictions.** *Eur J Pharmacol* 2000, **410**(2-3):249-268.
- 651 37. Smith AH, Jensen KP, Li J, Nunez Y, Farrer LA, Hakonarson H, Cook-Sather SD, Kranzler  
652 HR, Gelernter J: **Genome-wide association study of therapeutic opioid dosing identifies**  
653 **a novel locus upstream of OPRM1.** *Mol Psychiatry* 2017, **22**(3):346-352.
- 654 38. Houseman EA, Kile ML, Christiani DC, Ince TA, Kelsey KT, Marsit CJ: **Reference-free**  
655 **deconvolution of DNA methylation data and mediation by cell composition effects.**  
656 *BMC Bioinformatics* 2016, **17**:259.
- 657 39. Houseman EA, Accomando WP, Koestler DC, Christensen BC, Marsit CJ, Nelson HH,  
658 Wiencke JK, Kelsey KT: **DNA methylation arrays as surrogate measures of cell mixture**  
659 **distribution.** *BMC Bioinformatics* 2012, **13**:86.
- 660 40. Theda C, Hwang SH, Czajko A, Loke YJ, Leong P, Craig JM: **Quantitation of the cellular**  
661 **content of saliva and buccal swab samples.** *Sci Rep* 2018, **8**(1):6944.
- 662 41. Ni Choileain N, Redmond HP: **Cell response to surgery.** *Arch Surg* 2006, **141**(11):1132-  
663 1140.
- 664 42. Koestler DC, Christensen B, Karagas MR, Marsit CJ, Langevin SM, Kelsey KT, Wiencke JK,  
665 Houseman EA: **Blood-based profiles of DNA methylation predict the underlying**  
666 **distribution of cell types: a validation analysis.** *Epigenetics* 2013, **8**(8):816-826.
- 667 43. Reinius LE, Acevedo N, Joerink M, Pershagen G, Dahlen SE, Greco D, Soderhall C,  
668 Scheynius A, Kere J: **Differential DNA methylation in purified human blood cells:**

- 669           **implications for cell lineage and studies on disease susceptibility.** *PLoS One* 2012,  
670           7(7):e41361.
- 671   44.    Jaffe AE, Irizarry RA: **Accounting for cellular heterogeneity is critical in epigenome-wide**  
672           **association studies.** *Genome Biol* 2014, **15**(2):R31.
- 673   45.    Tabuchi T, Shimazaki J, Satani T, Nakachi T, Watanabe Y, Tabuchi T: **The perioperative**  
674           **granulocyte/lymphocyte ratio is a clinically relevant marker of surgical stress in**  
675           **patients with colorectal cancer.** *Cytokine* 2011, **53**(2):243-248.
- 676   46.    Hancock DB, Markunas CA, Bierut LJ, Johnson EO: **Human Genetics of Addiction: New**  
677           **Insights and Future Directions.** *Curr Psychiatry Rep* 2018, **20**(2):8.
- 678   47.    Kalsi G, Euesden J, Coleman JR, Ducci F, Aliev F, Newhouse SJ, Liu X, Ma X, Wang Y,  
679           Collier DA *et al*: **Genome-Wide Association of Heroin Dependence in Han Chinese.** *PLoS*  
680           *One* 2016, **11**(12):e0167388.
- 681   48.    Oertel BG, Doehring A, Roskam B, Kettner M, Hackmann N, Ferreiros N, Schmidt PH,  
682           Lotsch J: **Genetic-epigenetic interaction modulates mu-opioid receptor regulation.**  
683           *Hum Mol Genet* 2012, **21**(21):4751-4760.
- 684   49.    Elam C, Hesson L, Vos MD, Eckfeld K, Ellis CA, Bell A, Krex D, Birrer MJ, Latif F, Clark GJ:  
685           **RRP22 is a farnesylated, nucleolar, Ras-related protein with tumor suppressor**  
686           **potential.** *Cancer Res* 2005, **65**(8):3117-3125.
- 687   50.    Belcheva MM, Vogel Z, Ignatova E, Avidor-Reiss T, Zippel R, Levy R, Young EC, Barg J,  
688           Coscia CJ: **Opioid modulation of extracellular signal-regulated protein kinase activity is**  
689           **ras-dependent and involves Gbetagamma subunits.** *J Neurochem* 1998, **70**(2):635-645.
- 690   51.    Bian JM, Wu N, Su RB, Li J: **Opioid receptor trafficking and signaling: what happens**  
691           **after opioid receptor activation?** *Cell Mol Neurobiol* 2012, **32**(2):167-184.
- 692   52.    Valderrama-Carvajal A, Irizar H, Gago B, Jimenez-Urbieta H, Fuxe K, Rodriguez-Oroz MC,  
693           Otaegui D, Rivera A: **Transcriptomic integration of D4R and MOR signaling in the rat**  
694           **caudate putamen.** *Sci Rep* 2018, **8**(1):7337.
- 695   53.    Braunewell KH, Dwary AD, Richter F, Trappe K, Zhao C, Giegling I, Schonrath K, Rujescu  
696           D: **Association of VSNL1 with schizophrenia, frontal cortical function, and biological**  
697           **significance for its gene product as a modulator of cAMP levels and neuronal**  
698           **morphology.** *Transl Psychiatry* 2011, **1**:e22.
- 699   54.    Ready LB, Sarkis E, Turner JA: **Self-reported vs. actual use of medications in chronic**  
700           **pain patients.** *Pain* 1982, **12**(3):285-294.
- 701   55.    Ferreri F, Bourla A, Mouchabac S, Karila L: **e-Addictology: An Overview of New**  
702           **Technologies for Assessing and Intervening in Addictive Behaviors.** *Front Psychiatry*  
703           2018, **9**:51.
- 704   56.    Aryee MJ, Jaffe AE, Corrada-Bravo H, Ladd-Acosta C, Feinberg AP, Hansen KD, Irizarry  
705           RA: **Minfi: a flexible and comprehensive Bioconductor package for the analysis of**  
706           **Infinium DNA methylation microarrays.** *Bioinformatics* 2014, **30**(10):1363-1369.
- 707   57.    Zhou W, Laird PW, Shen H: **Comprehensive characterization, annotation and**  
708           **innovative use of Infinium DNA methylation BeadChip probes.** *Nucleic Acids Res* 2017,  
709           **45**(4):e22.
- 710   58.    Houseman EA, Molitor J, Marsit CJ: **Reference-free cell mixture adjustments in analysis**  
711           **of DNA methylation data.** *Bioinformatics* 2014, **30**(10):1431-1439.



- 712 59. Bates D, Machler M, Bolker BM, Walker SC: **Fitting Linear Mixed-Effects Models Using**  
713 **lme4**. *J Stat Softw* 2015, **67**(1):1-48.
- 714 60. Kuznetsova A, Brockhoff PB, Christensen RHB: **lmerTest Package: Tests in Linear Mixed**  
715 **Effects Models**. *J Stat Softw* 2017, **82**(13):1–26.
- 716

717

## 718 **Figure legends**

719 **Fig 1. Timeline of sample collection.** Saliva samples were collected before surgery and the two  
720 follow-up visits after surgery and end of opioid self-administration. The notations above the  
721 arrows show the range of days between events.

722

## 723 **Figure 2. Global patterns in DNA methylation across visits**

724 **(a)** The top principal component (PC1) extracted from the methylome-wide data explained  
725 63.5% of the variance, and the ANOVA plot shows significant differences between the three  
726 visits ( $F_{2,86} = 5.94$ , p-value = 0.004). **(b)** At visit 2, PC1 is correlated with number of days from  
727 surgery to the second visit ( $r = 0.40$ , p-value = 0.03,  $n = 31$ ). **(c)** The epigenome-wide association  
728 plot depicts the location of each CpG (autosomal chromosomes 1 to 22 on the x-axis) and the –  
729  $-\log_{10}(\text{p-value})$  for the effect of visit (y-axis). Genome-wide significant threshold was set at p-  
730 value =  $5 \times 10^{-8}$  (upper red horizontal line); suggestive threshold was set at p-value =  $10^{-5}$  (lower  
731 blue horizontal line). **(d)** Distribution of p-values for the effect of visit shows a significant  
732 deviation from the null hypothesis. **(e)** For the CpGs above the suggestive threshold,  
733 comparison of mean differences between visit 1 and visit 2 (x-axis), and visit 3 and visit 2 (y-  
734 axis) indicates a reversal in methylation patterns from visit 2 to visit 3, with the majority of sites  
735 showing lower methylation at visit 2, and then increasing in methylation by visit 3.

736

## 737 **Figure 3. Estimated cell type proportions and associated variables**

738 **(a)** Cell 1 shows both longitudinal and cross-sectional variability. Proportion of cell 1 is  
739 negatively correlated with age at visit 2 ( $r = -0.48$ ,  $p$ -value = 0.006,  $n = 31$ ; black squares and  
740 dashed line), but not at visit 1 ( $r = -0.13$ ,  $p$ -value = 0.49,  $n = 31$ ; red x markers and dotted line),  
741 and only slightly at visit 3 ( $r = -0.32$ ,  $p$ -value = 0.10,  $n = 27$ ; grey circles and solid line). **(b)** Cell 3  
742 is associated with cross-sectional variability but no significant longitudinal change. The  
743 estimated proportion has a strong positive correlation with age at all three visits. At visit 1,  $r =$   
744 0.36 ( $p$ -value = 0.05); visit 2,  $r = 0.57$  ( $p$ -value = 0.0009); visit 3,  $r = 0.48$  ( $p$ -value = 0.01). **(c)** Cell  
745 3 also shows a significantly higher proportion in African Americans at all three visits ( $F_{2,28} =$   
746 15.66,  $p$ -value < 0.0001 at visit 1). **(d)** Cell 2 is also ethnicity specific and associated with lower  
747 proportion in African Americans at all three visits ( $F_{2,28} = 4.77$ ,  $p$ -value < 0.02 at visit 1).  
748

#### 749 **Figure 4. *OPRM1* promoter CpG methylation**

750 **(a)** The *OPRM1* promoter and the CpG island (green block) are depicted along with base pair  
751 coordinates (black line; GRCh37/hg19), and location of the 10 CpGs (filled circles). Residual  $\beta$ -  
752 values were extracted after fitting participant ID as random intercept, and the plots show the  
753 methylation patterns across the three visits for CpG1, CpG2, CpG6, and CpG7 (panels with  
754 ANOVA line plots; error bars are standard error). The difference between the dosage groups  
755 appears at visit 3 (for CpG1, CpG2, CpG6) and visit 2 (for CpG7). The lowest cumulative dose  
756 group (<25 MME: blue dotted line) has lower average methylation compared to the two higher  
757 cumulative dose groups (25–90 MME: yellow dashed line;  $\geq 90$  MME: red solid line). **(b)** The  
758 promoter mean methylation was taken as the average  $\beta$ -values for CpG1 to CpG9. After fitting a

759 regression model with adjustment for age and cell proportions, the leverage plots show a  
760 significantly higher average promoter methylation (y-axes) associated with higher MME (x-axis,  
761 left panel), and longer duration of use (x-axis; right panel). MME is morphine milligram  
762 equivalent.

763 **Figure 5. Epigenome-wide test for prescription opioid dosage.**

764 **(a)** The epigenome-wide Manhattan plot depicts the location of each CpG (autosomal  
765 chromosomes 1 to 22 on the x-axis) and the  $-\log_{10}(\text{p-value})$  for the effect of dosage (y-axis).  
766 Genome-wide significant threshold was set at p-value =  $5 \times 10^{-8}$  (upper red horizontal line);  
767 suggestive threshold was set at p-value =  $10^{-5}$  (lower blue horizontal line).

768 For the six CpG sites that were above the genome-wide suggestive threshold, residual  $\beta$ -values  
769 were extracted after fitting participant ID as random intercept, and the plots show the  
770 methylation patterns across the three visits (error bars are standard error) for **(b)** cg08105965  
771 (*RASL10A*), **(c)** cg18500286 (*AFF1*), **(d)** cg04718304 (intergenic), **(e)** cg16719801 (*VSNL1*), **(f)**  
772 cg08163714 (*ANXA2*), and **(g)** cg25124965 (*PAIP2*). For most of these, the difference between  
773 the dosage groups appears at visits 1 and 3.

774

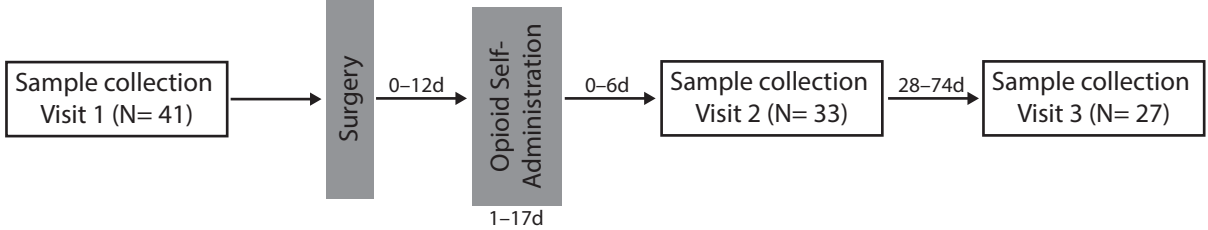

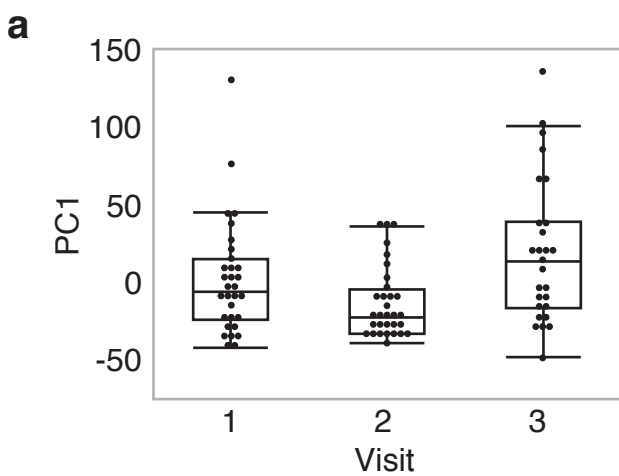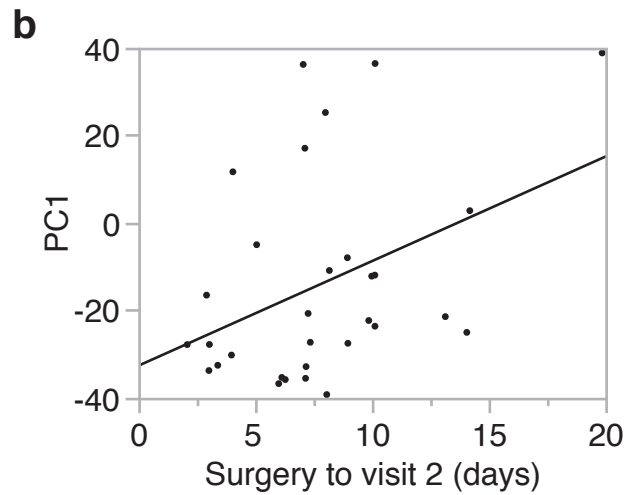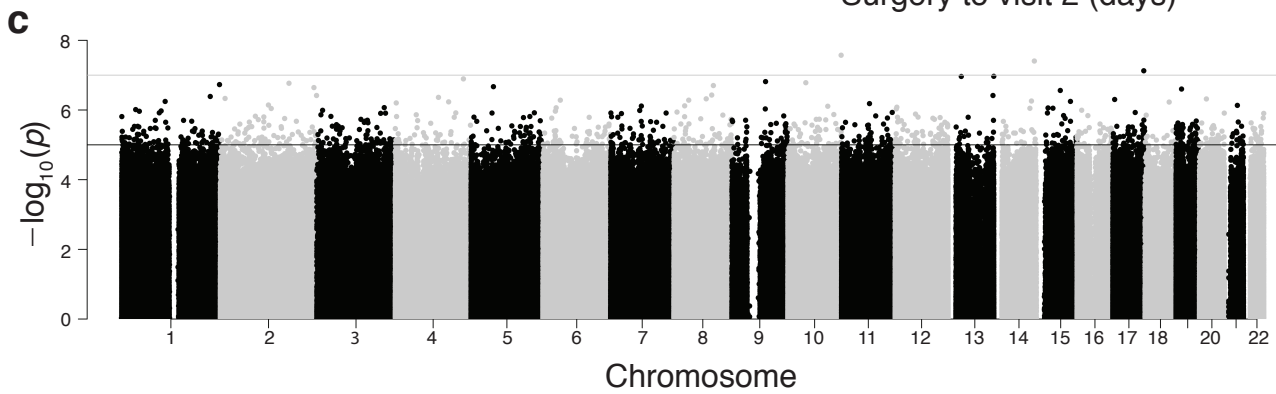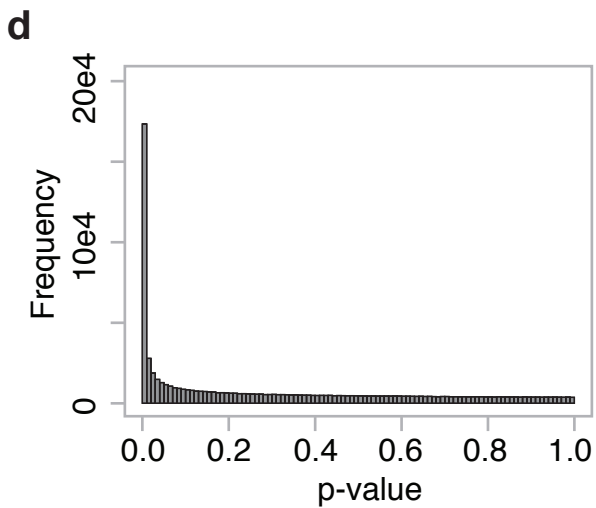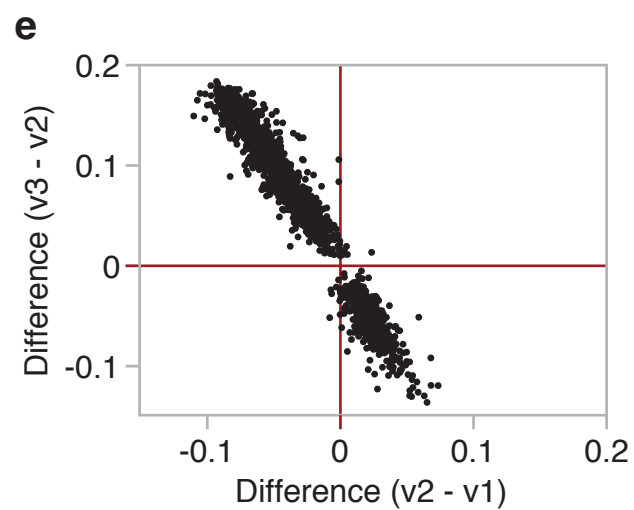

**a**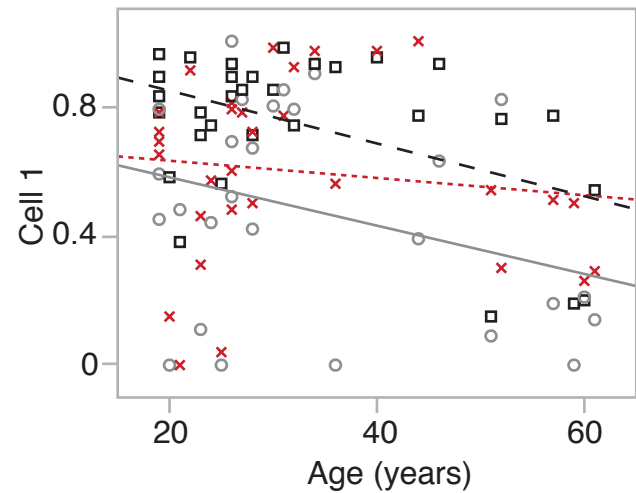**b**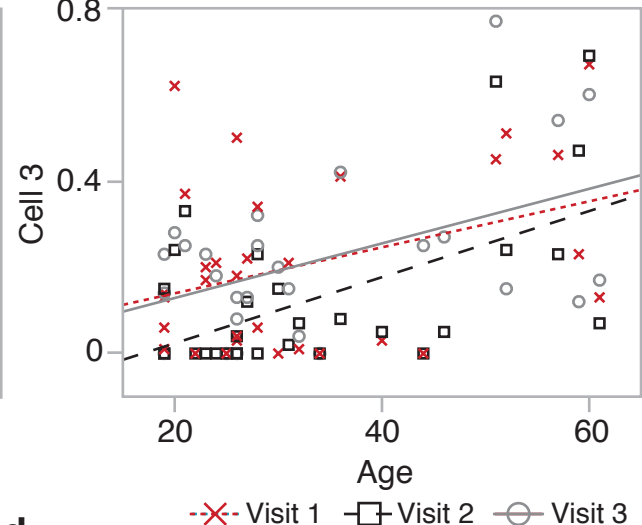**c**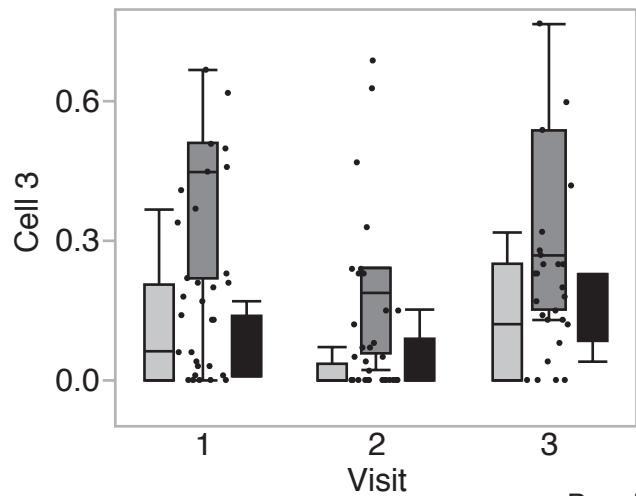**d**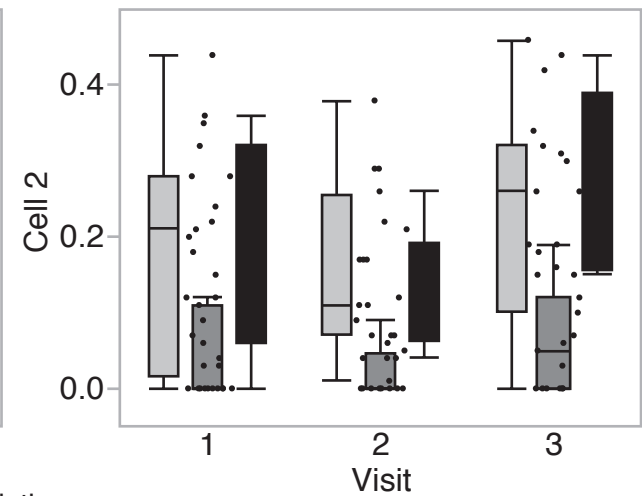

Population group

Caucasians/White
  AfricanAmericans/Black
  Other

**a**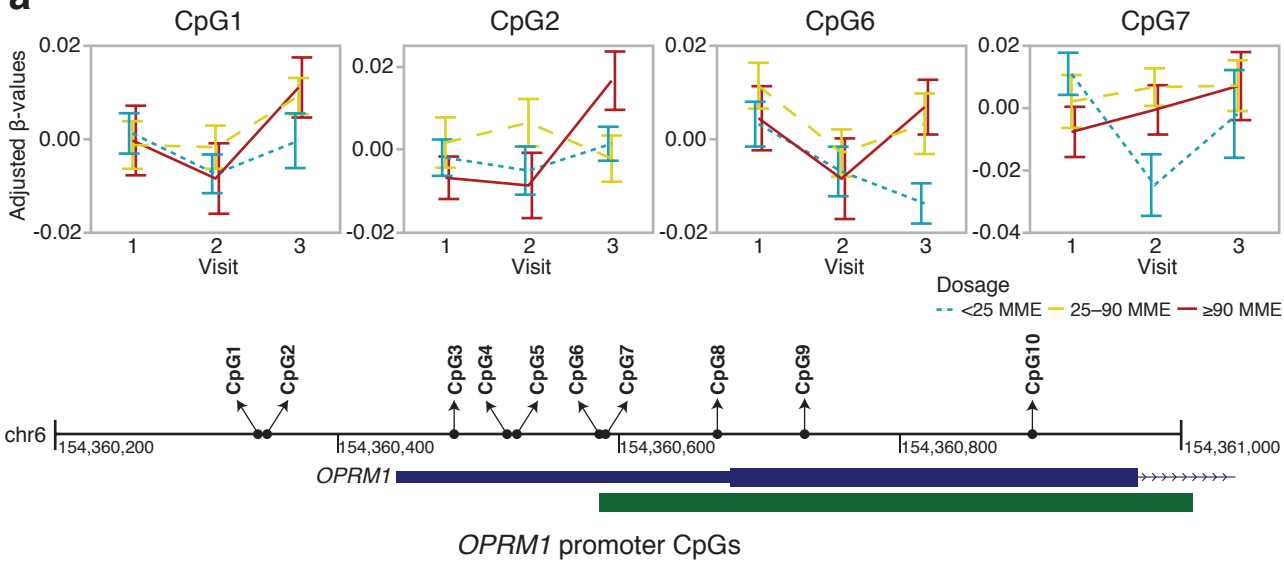**b**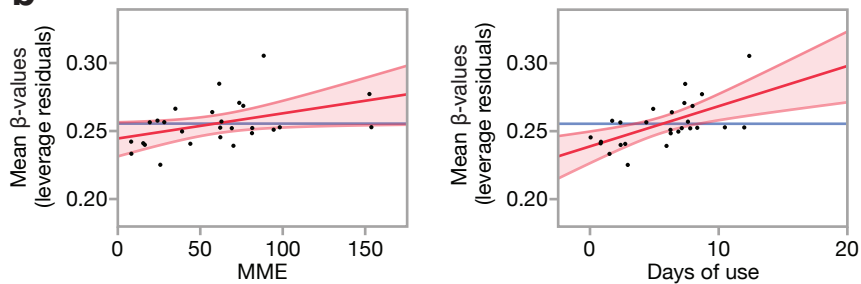



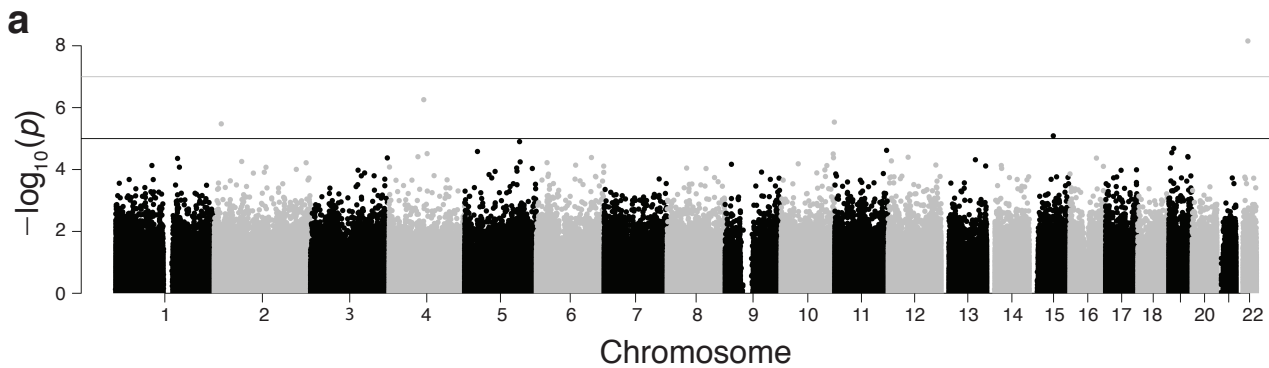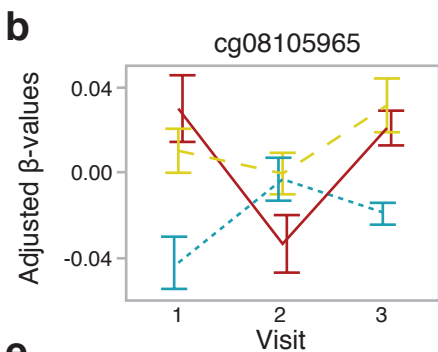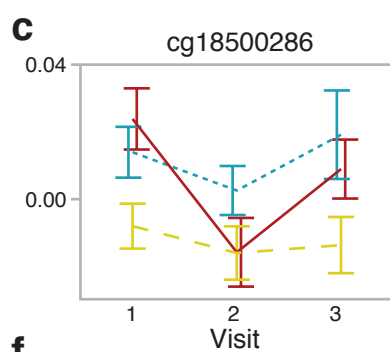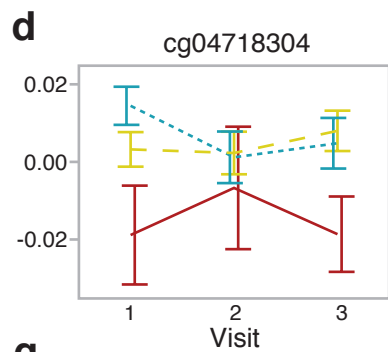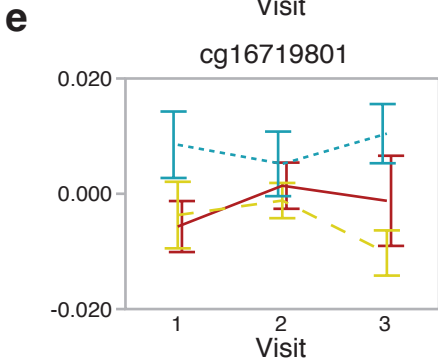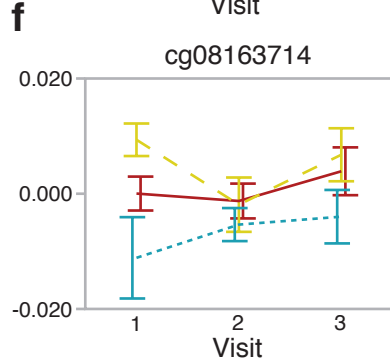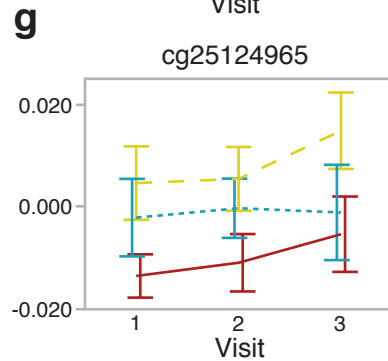

Dosage

--- <25 MME    - - - 25-90 MME    —  $\geq 90$  MME
