1 **Effect of short-term prescription opioids on DNA methylation of the**

2 ***OPRM1* promoter**

3 Jose Vladimir Sandoval-Sierra<sup>1</sup>, Francisco I Salgado García<sup>1</sup>, Jeffrey H Brooks<sup>2</sup>,

4 Karen J Derefinko<sup>1</sup>, Khyobeni Mozhui<sup>1\*</sup>

5

6 <sup>1</sup> Department of Preventive Medicine, College of Medicine, University of

7 Tennessee Health Science Center, Memphis, Tennessee, USA

8 <sup>2</sup> Department of Oral and Maxillofacial Surgery, College of Dentistry, University of

9 Tennessee Health Science Center, Memphis, Tennessee, USA

10

11 **\*Corresponding author: [kmozhui@uthsc.edu](mailto:kmozhui@uthsc.edu)**

12

## 13 **Abstract**

14 **Background.** Long-term opioid use has been associated with hypermethylation of the opioid  
15 receptor mu 1 (*OPRM1*) promoter. Very little is currently known about the early epigenetic  
16 response to therapeutic opioids. Here we examine whether we can detect a similar increase in  
17 DNA methylation in the days following the use of prescribed opioids. Longitudinal changes in  
18 DNA methylation was assayed using the Illumina Infinium Human MethylationEPIC array in a  
19 cohort of 33 opioid-naïve participants who underwent standard dental surgery followed by  
20 opioid medication self-administration. Saliva samples were collected before surgery (visit 1),  
21 and at two postsurgery visits at  $2.7 \pm 1.5$  days (visit 2), and  $39 \pm 10$  days (visit 3) after the  
22 discontinuation of opioid analgesics.

23 **Results.** The perioperative methylome underwent significant changes over the three visits. This  
24 was unrelated to opioids, and primarily due to postoperative inflammatory response and  
25 alteration in cellular composition. Deconvolution of cell heterogeneity indicated an increase in  
26 granulocytes at visit 2 and compensatory decline by visit 3. To specifically examine the effect of  
27 opioids, we applied a candidate gene approach and evaluated 10 CpGs located in the *OPRM1*  
28 promoter. There was significant cross-sectional variability in opioid use, and for participants  
29 who self-administered the prescribed drugs, the total dosage ranged from 5–210 morphine  
30 milligram equivalent (MME). Participants were categorized by cumulative dosage into three  
31 groups: <25 MME, 25–90 MME,  $\geq 90$  MME. Using mixed effects modeling, 4 CpGs had significant  
32 positive associations with opioid dose at 2-tailed p-value < 0.05, and overall, 9 of the 10 CpGs  
33 showed the predicted higher methylation in the higher dose groups relative to the lowest dose  
34 group. After adjustment for age and cellular heterogeneity, the promoter mean methylation

35 also had positive associations with cumulative MME (regression coefficient = 0.0002, 1-tailed p-  
36 value = 0.02), and duration of opioid use (regression coefficient = 0.003, 1-tailed p-value =  
37 0.001), but this effect was significant only for visit 3.

38 **Conclusion.** The present study provides evidence that the hypermethylation of the *OPRM1*  
39 promoter is in response to opioid use, and such epigenetic restructuring can be induced even  
40 by short-term use of therapeutic opioids.

41

42 **Key words:** prescription opioids, DNA methylation, addiction, opioid use disorder

## 43 **Background**

44 Prescription opioids were once considered as a relatively benign treatment for pain  
45 management [1, 2]. However, over the past decade, prescribed analgesics have emerged as a  
46 major socio-environmental factor that has contributed to the opioid epidemic [3, 4]. For many  
47 individuals who develop opioid use disorder (OUD), the initiation phase may begin with  
48 treatment for acute pain or minor surgery, with primary care physicians and dentists  
49 accounting for a large fraction of prescribed opioids [5-11]. Even short-term use (e.g., up to  
50 three days) is a risk factor for some individuals, and the risk for addiction increases  
51 proportionally with dosage and duration of use [8, 9, 12-15].

52 Drug addiction is a chronic disease that is triggered by an exposure to an environmental agent.  
53 Following the initial exposure, the addictive substance continues to have a persistent effect,  
54 and this suggests a form of cellular memory. There is strong evidence that epigenetic processes,  
55 including DNA methylation, play a key role in maintaining the long-term effects of the additive  
56 substance [16, 17]. Studies particularly in model organisms have shown that drugs of abuse  
57 trigger intracellular signaling cascades that alter gene transcription; the repeated exposure to  
58 the drug then results in remodeling of the epigenome that persists over time; and these  
59 epigenetic processes maintain the long-term changes in steady-state gene expression that  
60 underlie addiction [16, 18-20]. Work in humans generally relies on postmortem tissue from  
61 long-term drug users, and studies have found significant epigenetic differences in the brain of  
62 former addicts compared to non-addicts [21, 22]. While the brain is the most relevant tissue in  
63 terms of neuroadaptation and drug seeking behavior, epigenetic marks of addiction have also  
64 been detected in peripheral tissues such as blood and sperm [23-28]. Easily accessible

65 peripheral tissues are clearly the practical choice when it comes to defining biomarkers of drug  
66 use and/or predictors of individual risk for addiction.

67 The  $\mu$ -opioid receptor gene (*OPRM1*) encodes the primary target for both endogenous and  
68 exogenous opioids and plays a central role in mediating the rewarding and therapeutic effects.  
69 The CpG island located in the promoter of this gene is a potential sensor for drug use, and  
70 multiple studies in leukocytes and sperm have found higher DNA methylation among long-term  
71 opioid users compared to control samples [23, 29-33]. Hypermethylation of the promoter  
72 region has also been found among people with alcohol dependence [34]. However, as all these  
73 studies are cross-sectional comparisons between opioid exposed individuals and controls, there  
74 is no definite way to discern whether the epigenetic differences are the cause, or effect, of drug  
75 use. Since genetic variants within and near the *OPRM1* gene have also be associated with  
76 susceptibility to addiction and drug sensitivity[35-37], it is plausible that such epigenetic marks  
77 represent genetic effects that preceded drug use. Another lingering question is, if the  
78 epigenetic marks are induced by drug use, does the hypermethylation of the promoter CpGs  
79 occur only after repeated and sustained exposure, or are these indicators of the early  
80 epigenomic, and potentially transcriptomic, responses to drugs? In the case of potent drugs  
81 such as opioids, the initial exposure is a crucial phase in the pathway to drug dependence and  
82 addiction, and it is reasonable to expect some of the modification to the epigenome to occur  
83 within the first few exposures.

84 To address these questions, we applied a longitudinal design and collected saliva samples and  
85 self-reports of opioid use from a group of opioid naïve dental patients before oral surgery, and  
86 at two follow-up visits after surgery. We assayed genome-wide DNA methylation and explored

87 (1) the methylome during the perioperative period, (2) how demographic variables such as age  
88 and race/ethnicity relate to the methylome changes and immune response, and (3) whether we  
89 can discern opioid associated CpGs from the highly heterogeneous methylome data. As the site  
90 of surgery and postsurgery inflammatory response, saliva is a particularly challenging specimen.  
91 To overcome this, we applied *in-silico* approaches to deconvolute the underlying cellular  
92 heterogeneity and demonstrate the utility of the methylome-based cell estimates as proxies for  
93 the immune changes induced by surgery. For the effect of opioids, we specifically focused on  
94 the *OPRM1* promoter CpGs and evaluated whether we can replicate the CpG hypermethylation.  
95 Overall our results show a dosage-dependent increase in methylation that can be discerned  
96 despite extensive heterogeneity, indicating that the epigenetic response to opioids occurs  
97 within the first few days to weeks following exposure to the drug.

## 98 **Results**

99 The number of enrolled participants (N = 41) and timeline of sample collection are shown in Fig.  
100 1. Only 33 patients (19 females) received prescription opioids after an oral procedure. The  
101 baseline characteristics and opioid use data are reported only for these 33 participants (Table  
102 1). Following the pre-surgery visit (visit 1 or v1), the second visit (visit 2 or v2) occurred after  
103 surgery and within a week of the last opioid dose (average number of days between last opioid  
104 dose and visit 2 was  $2.7 \pm 1.5$  days). The last sample collection (visit 3 or v3) occurred between  
105 32–88 days from surgery, and the number of days between the last opioid dose and visit 3 was  
106  $39 \pm 10$  days. In total, 26 participants provided saliva samples at all three visits, 6 participants  
107 provided saliva at two visits, and one provided saliva only at v1 (Table 1). The mean age was  
108  $33.61 \pm 13.84$  years and ranged from 19 to 61 years (Table 1). Based on self-reported

109 race/ethnicity, there were 13 Caucasians (mean age =  $31.69 \pm 14.11$  years), 13 African  
110 Americans (mean age =  $39.92 \pm 13.91$ ), and the remaining 7 were of “other” racial/ethnic group  
111 (mostly Hispanic/Latino; mean age =  $25.43 \pm 8.02$ ). Individual level information is provided as  
112 Additional file 1: Table S1. The African American group was slightly older but there was no  
113 statistically significant difference in age between the groups (p-value = 0.06). Sex distribution  
114 was not significantly different between the race/ethnic groups.

115 Postoperative opioid dosing data was based on self-reported pill counts, converted to morphine  
116 milligram equivalent (MME). With the exception of one individual who used no opioids (and we  
117 consider this individual to represent a dose of 0 MME with 0 days of use), all the patients  
118 started opioid treatment generally within 24 hours of surgery, and continued use for an average  
119 of  $6 \pm 4$  days for up to 17 days (Additional file 1: Table S1). As expected, the cumulative dosage  
120 correlated with length of use ( $r = 0.67$ , p-value < 0.0001). For the 32 participants that self-  
121 administered opioids, the total cumulative dosage over the course of treatment ranged from 5–  
122 210 MME. Based on the quantile distribution of the cumulative MME, participants were  
123 classified into three groups: <25 MME (those below the 25<sup>th</sup> percentile or quartile 1 for opioid  
124 dosage), 25–90 MME (those within the interquartile range), and  $\geq 90$  MME (those above the  
125 75<sup>th</sup> percentile or quartile 3) (Table 1). Opioid dosage showed no significant association with  
126 age, sex, and self-reported race/ethnicity.

127

128

129

130 **Table 1. Participant characteristics and postoperative opioid use**

| <b>Variables<sup>a</sup></b>                    |                             |
|-------------------------------------------------|-----------------------------|
| <b>Sex</b>                                      |                             |
| Female                                          | 19                          |
| Male                                            | 14                          |
| <b>Age (years)</b>                              | 33.61 ± 13.84               |
| <b>Self-reported race/ethnicity</b>             |                             |
| African-American                                | 13                          |
| Caucasian                                       | 13                          |
| Other <sup>b</sup>                              | 7                           |
| <b>Prescribed opioid medication</b>             |                             |
| Hydrocodone 5mg                                 | 19                          |
| Oxycodone 5mg                                   | 12                          |
| Oxycodone 10mg                                  | 1                           |
| Oxycodone 5mg and Codeine 30mg                  | 1                           |
| <b>Length of opioid use in days (mean ± sd)</b> | 6 ± 4                       |
| <b>MME<sup>c</sup> (mean ± sd)</b>              | 64.91 ± 48.88               |
| <25 MME (<Q1)                                   | 10                          |
| 25–90 MME (Q1–Q3)                               | 13                          |
| ≥90 MME (≥Q3)                                   | 10                          |
| <b>Surgery to visit 2 in days (mean ± sd)</b>   | 8.0 ± 4.1                   |
| <b>Surgery to visit 3 in days (mean ± sd)</b>   | 43.9 ± 10.9                 |
| <b>Number of completed visits</b>               |                             |
| Three visits (v1, v2, and v3)                   | 26 participants             |
| Two visits (v1 and v2)                          | 5 participants <sup>d</sup> |
| Two visits (v2 and v3)                          | 1 participant               |
| Only v1                                         | 1 participant               |

131 <sup>a</sup> Mean and standard deviation (sd) for continuous variables and counts for categorical variables

132 <sup>b</sup> Other= Hispanic/Latino, Asian, Middle-eastern, and Native American

133 <sup>c</sup> Opioid dose converted to morphine milligram equivalent (MME) according to medication type; Q1 is the first  
134 quartile (25%) and Q3 is the third quartile (75%)

135 <sup>d</sup> Methylome data for one participant with v1 and v2 samples were excluded during the methylome data check  
136 (see methods)

137

## 138 **Global shift in postoperative methylome**

139 For an overview of the methylome and the variance structure, we started with a principal

140 component analysis (PCA) using the full set of high-quality probes (736,432 probes passed QC

141 criteria). The top PC (PC1) captured a vast portion of the variance at 63.5%, and following that,



142 PC2 and PC3 captured only 2.5% and 1.6% of variance, respectively (PCs for each methylome  
143 data in Additional file 1: Table S2). PC1 was not significantly associated with the demographic  
144 variables (sex, age, self-reported race/ethnicity). Instead, visit was the most significant  
145 explanatory variable for PC1 ( $F_{2,86} = 5.94$ ,  $p$ -value = 0.004), and the pattern indicated a  
146 significant change in the methylome with the strongest contrast between v3 and v2 (Tukey-  
147 Kramer *post hoc*  $p$ -value = 0.003) (Fig. 2a). To deduce whether the longitudinal variance capture  
148 by PC1 could be explained by the length of time from surgery or opioid self-administration, we  
149 performed bivariate analyses between PC1 and the following variables: opioid dose, days from  
150 surgery to sample collection, and days from last opioid self-administration to sample collection.  
151 This analysis was done for the three visits separately, and at v2, PC1 had a modest but  
152 significant correlation with days from surgery to v2 ( $r = 0.40$ ,  $p$ -value = 0.03,  $n = 31$  participants  
153 with methylome data at v2; Fig. 2b). Similarly, at v3, PC1 was correlated with days from surgery  
154 to v3 ( $r = 0.41$ ,  $p$ -value = 0.04,  $n = 27$  participants with methylome data at v3). PC1 was not  
155 correlated with opioid dose or the number of days from the last opioid use. From this, we can  
156 infer that the longitudinal shift in the methylome is primarily due to surgery.

157 To profile the CpGs that changed longitudinally over the three visits we performed a mixed  
158 effects ANOVA with visit as a fixed variable and the person ID as random effect (Fig. 2c). The  $p$ -  
159 values for visit showed a significant deviation from the null hypothesis (Fig. 2d histogram).  
160 However, only 2 intergenic CpGs (cg05639411 and cg24904009) were above the genome-wide  
161 significant threshold of  $5.0e-8$  (Fig. 2c) and overall, the pattern indicated a modest shift in the  
162 methylome across several CpGs. At a genome-wide suggestive threshold of  $p$ -value =  $1.5e-5$ ,  
163 there were 1701 CpGs that underwent change over the visits (Additional file 1: Table S3). The

164 majority of these CpGs (>65%) decreased in methylation between v1 and v2, and regained  
165 methylation by v3 such that these sites showed significantly higher levels of methylation at v3  
166 compared to both v1 and v2 (Fig. 2e). Similarly, for the ~35% of CpGs that gained methylation  
167 between v1 and v2, these sites generally declined in methylation by v3 such that these sites  
168 were significantly lower in methylation compared to both v1 and v2 (Fig. 2e). Gene set  
169 enrichment analysis (GSEA) of the 1133 annotated genes represented by the CpGs conveyed  
170 mostly an innate immune inflammatory response (Additional file 1: Table S4). The most  
171 overrepresented pathway was natural killer cell mediated cytotoxicity (KEGG ID hsa04650;  
172 normalized enrichment score = -1.93, FDR = 0.03), and the most overrepresented function was  
173 genes involved in cellular defense response (GO ID 0006968; normalized enrichment score = -  
174 1.83 p = 0.001, FDR = 0.3), and these immunity related categories were enriched among the  
175 CpGs that decreased in methylation at v2. The opioid receptors were not represented in the list  
176 of visit associated CpGs. Based on these observations, a possible explanation for the shift in the  
177 methylome is that it is the result of surgery induced immune response and changes in the oral  
178 cell composition. The opioid use, if it had an impact, is likely to exert a weaker signal, and given  
179 the limited sample size, more suitable for a focused candidate gene study.

## 180 **Deconvolution of cellular heterogeneity**

181 To decompose cell types from the composite DNA methylation signal, we applied a reference-  
182 free approach [38]. The bootstrapping method described in Houseman et al. [38] determined K  
183 = 4 cell types (Additional file 1: Table S2). Cell 1, which represented the most abundant cell  
184 type, showed an increase at v2 right after surgery, and a decline by v3 (Table 2). Aside from cell  
185 1, no other cell showed significant change over the visits (Table 2). To deduce what cell types

186 are represented by the 4 groups, we also estimated blood leukocyte proportions (mainly  
187 lymphocytes and granulocytes/neutrophils) using a reference-based approach [39], and  
188 compared correlations between the 4 cell types to the reference-based cell estimates (Table 2;  
189 Additional file 1: Table S2). Cell 1 had a strong positive correlation with granulocytes, and cell 4  
190 had a strong positive correlation with lymphocytes indicating that cells 1 and 4 are chiefly  
191 representative of the leukocyte population in saliva and serves as a proxy for the increase in  
192 granulocyte proportions after surgery. Cells 2 and 3 had only modest correlations with the  
193 leukocyte estimates ( $|r|$  of 0.4–0.5) and may be more representative of the epithelial cells.  
194 The cell estimates were not associated with opioid dose. To evaluate if the baseline  
195 characteristics were related with the cellular composition, we tested association with age, sex  
196 and race/ethnicity and the three visits. Cell 1 had a significant negative correlation with age ( $r =$   
197  $-0.48$ ,  $p$ -value = 0.006) only at v2 that suggests an age-dependent immune response in the days  
198 immediately after surgery (Fig. 3a). Cell 3 had the strongest association with age at all three  
199 visits (Fig. 3b). Cells 2 and 3 showed extensive cross-sectional variability without longitudinal  
200 change, and both were significantly associated with race/ethnicity at all three visits that  
201 indicates that these could serve as proxies for the cellular composition differences between  
202 populations (Fig. 3c, 3d). Cell 4 was not associated with any of the baseline variables, and sex  
203 was not a factor for any of the cell types.

204

205

206

207

208 **Table 2. Reference-free and reference-based estimates of cellular proportions**

| Cell types   | Cell proportions by visit (mean $\pm$ SD) |                 |                 |                            | Pearson r with reference-based estimates |              |
|--------------|-------------------------------------------|-----------------|-----------------|----------------------------|------------------------------------------|--------------|
|              | Visit 1                                   | Visit 2         | Visit 3         | Visit p-val                | Lymphocytes                              | Granulocytes |
|              | <i>Reference-free estimates</i>           |                 |                 |                            |                                          |              |
| Cell 1       | 0.60 $\pm$ 0.28                           | 0.74 $\pm$ 0.23 | 0.47 $\pm$ 0.32 | $F_{2,86} = 6.6,$<br>0.002 | -0.96                                    | 0.95         |
| Cell 2       | 0.13 $\pm$ 0.13                           | 0.10 $\pm$ 0.10 | 0.17 $\pm$ 0.15 | ns                         | 0.51                                     | -0.47        |
| Cell 3       | 0.21 $\pm$ 0.20                           | 0.12 $\pm$ 0.18 | 0.22 $\pm$ 0.19 | ns                         | 0.43                                     | -0.40        |
| Cell 4       | 0.07 $\pm$ 0.18                           | 0.03 $\pm$ 0.08 | 0.14 $\pm$ 0.23 | $F_{2,86} = 2.7,$<br>0.07  | 0.77                                     | -0.81        |
|              | <i>Reference-based estimates</i>          |                 |                 |                            |                                          |              |
| Granulocytes | 0.71 $\pm$ 0.14                           | 0.77 $\pm$ 0.10 | 0.64 $\pm$ 0.18 | $F_{2,86} = 6.1,$<br>0.003 |                                          |              |
| Lymphocytes  | 0.27 $\pm$ 0.12                           | 0.21 $\pm$ 0.09 | 0.33 $\pm$ 0.15 | $F_{2,86} = 6.6,$<br>0.002 |                                          |              |

209

## 210 **Effect of opioid dose on *OPRM1* promoter methylation**

211 To examine if higher opioid dose is related to higher promoter methylation, we used a  
 212 candidate gene approach and focused on the CpGs located in the *OPRM1* promoter. In total, 10  
 213 promoter CpGs were targeted by the Illumina probes and these encompassed the CpG island  
 214 described by Nielsen et al. and replicated by Chorbov et al. [29, 30] (Fig. 4a; Table 3; individual  
 215 level  $\beta$ -values in Additional file 1: Table S2). We first applied a mixed regression model with  
 216 opioid dosage group and visit as fixed categorical variables, and each participant ID as random  
 217 intercept. With the exception of the last CpG, the regression estimates for all the *OPRM1*  
 218 promoter CpGs were positive with higher methylation levels for the two higher dosage groups  
 219 (i.e., 25-90 MME and  $\geq$  90 MME) relative to the lowest dosage group (<25 MME) (Table 3). At a  
 220 nominal p-value of 0.05, 4 CpG were significantly associated with opioid dosage groups. The  
 221 ANOVA plots for these CpGs showed that the difference between the dosage groups was  
 222 pronounced at v3 (for CpG1, CpG2, CpG6) and v2 (for CpG7) but not at v1 (Fig. 4a).

223 To check whether the association with opioid dosage can be robustly detected, we summarized  
 224 the overall methylation pattern in the promoter by taking the mean DNA methylation  $\beta$ -values  
 225 for the nine CpGs that were positively associated with opioid dosage (CpG1 to CpG9). We  
 226 applied a linear regression model and tested whether higher mean methylation was associated  
 227 with either higher MME or longer length of opioid use. This analysis was done for the three  
 228 visits separately and adjusted for age and cellular heterogeneity. Both MME and length of  
 229 opioid use were associated with higher mean methylation, but this effect was significant only at  
 230 v3, further indicating that the hypermethylation of the *OPRM1* receptor is more likely a  
 231 response rather than a predisposing factor (Fig. 4b; Table 4). Our results are consistent with the  
 232 opioid associated hypermethylation and indicates that even a relatively short-term use may  
 233 induce increase in methylation that is proportional to dosage at the *OPRM1* promoter.

234

235 **Table 3. Dose dependent methylation of individual *OPRM1* promoter CpGs**

| CpG   | ProbeID    | <25 MME vs. 25–90 MME <sup>1</sup> |       | <25 MME vs. ≥90 MME <sup>1</sup> |       | Dosage anova <sup>2</sup> |             |
|-------|------------|------------------------------------|-------|----------------------------------|-------|---------------------------|-------------|
|       |            | Coef                               | t-val | Coef                             | t-val | F <sub>2,29</sub>         | p           |
| CpG1  | cg22370006 | 0.041                              | 2.66  | 0.023                            | 1.39  | 3.53                      | <b>0.04</b> |
| CpG2  | cg14262937 | 0.051                              | 2.77  | 0.014                            | 0.69  | 4.20                      | <b>0.02</b> |
| CpG3  | cg06649410 | 0.047                              | 1.65  | 0.010                            | 0.31  | 1.56                      | 0.23        |
| CpG4  | cg23143142 | 0.018                              | 1.56  | 0.000                            | -0.04 | 1.71                      | 0.20        |
| CpG5  | cg23706388 | 0.010                              | 0.76  | 0.006                            | 0.38  | 0.29                      | 0.75        |
| CpG6  | cg05215925 | 0.019                              | 2.73  | 0.012                            | 1.59  | 3.74                      | <b>0.04</b> |
| CpG7  | cg14348757 | 0.042                              | 2.78  | 0.019                            | 1.16  | 3.92                      | <b>0.03</b> |
| CpG8  | cg12838303 | 0.026                              | 2.08  | 0.022                            | 1.64  | 2.38                      | 0.11        |
| CpG9  | cg22719623 | 0.006                              | 0.52  | 0.004                            | 0.33  | 0.14                      | 0.87        |
| CpG10 | cg15085086 | -0.029                             | -0.94 | -0.040                           | -1.19 | 0.78                      | 0.47        |

236 <sup>1</sup>Regression estimates for higher dose groups (25–90 MME and ≥90 MME) relative to lowest dose group (<25  
 237 MME) based on linear mixed effects model: lmer(CpG ~ dose + visit + (1|ID))

238 <sup>2</sup>Two-tailed p-values for the main effect of dosage groups

239

240 **Table 4. Mean methylation in the *OPRM1* promoter and association with opioid dose and**  
241 **days of use**

|                                   | MME dosage effect Visit 3 <sup>2</sup> |       |                     | Days of opioid use effect Visit 3 <sup>2</sup> |       |                     |
|-----------------------------------|----------------------------------------|-------|---------------------|------------------------------------------------|-------|---------------------|
|                                   | Coef                                   | t-val | <i>p</i> (1-tailed) | Coef                                           | t-val | <i>p</i> (1-tailed) |
| Promoter methylation <sup>1</sup> | 0.0002                                 | 2.16  | 0.02                | 0.003                                          | 3.47  | 0.001               |

242 <sup>1</sup>*OPRM1* promoter methylation summarize by averaging the  $\beta$ -values for CpG1 to CpG9

243 <sup>2</sup>Linear regression at visit 3, one-tailed *p*-value to test hypermethylation with higher cumulative MME or longer  
244 duration of use

245

## 246 Discussion

247 Here we carried out DNA methylation assay in longitudinally collected saliva samples from a  
248 cohort of opioid naïve dental patients who received prescription opioids following oral surgery.

249 Due to the small sample size and the heterogeneity in the methylome data, we used a  
250 candidate gene approach rather than an epigenome-wide study to evaluate the effect of  
251 therapeutic opioids. To summarize the main result, we found increased methylation at the  
252 *OPRM1* promoter associated with higher cumulative opioid dose. This replicates the  
253 hypermethylated profile among long-term opioid users and alcohol dependent individuals [23,  
254 29-34]. The pattern of methylation we observed indicates that the increase in methylation is  
255 more likely the response to, rather than the cause of, opioid use [20]. The present study  
256 provides evidence that such epigenetic modifications are induced within the early days of drug  
257 use and may represent the early epigenomic responses to an addictive substance.

258 A peculiar challenge we faced was that the site of sample collection was also the site of surgery.

259 Saliva has a highly heterogeneous cellular makeup and is estimated to constitute about ~45%  
260 epithelial cells, and about ~55% leukocytes from circulating blood [40]. The main goal of the

261 study was to detect the effect of short-term and comparatively low-dose opioids, while  
262 accounting for the larger perturbation caused by surgery. The oral surgery was a minor and  
263 relatively non-invasive procedure; nonetheless, the patients would experience injury induced  
264 inflammatory response that can induce changes in numbers of circulating immune cells [41],  
265 and consequently, changes in the oral cell composition. As DNA methylation is highly cell-type  
266 specific, the heterogeneity in cells will be a major source of “noise” in the methylome data [39,  
267 42-44]. The longitudinal variability in DNA methylation that was captured by the top PC can  
268 therefore be attributed to cell composition rather than opioid use. We could deduce this by the  
269 significant correlation between PC1 and the number of days from surgery to the follow-up  
270 visits. We were able to partly resolve the cell heterogeneity by applying reference-free and  
271 reference-based estimates of cell proportions. The reference-free method estimated four major  
272 cell types. Although the saliva certainly has more than just 4 types of cells [40], the classification  
273 into 4 broad groups likely reflects the limitation in the *in-silico* approach to resolve finer  
274 differences between cellular subtypes. Cell 1 most likely represented the granulocyte  
275 population (chiefly neutrophils), which constitutes the most abundant leukocyte subtype in  
276 circulating blood, and responsible for innate immunity and acute inflammatory response.  
277 Consistent with the known increase in granulocyte-to-lymphocyte ratio in the few days  
278 following surgery [45], we also found an increase in cell 1 and relative abundance of  
279 granulocytes compared to lymphocytes at visit 2. This was followed by a compensatory  
280 decrease in granulocyte proportions by visit 3. Cell 2 and cell 3 are presumed to represent a  
281 portion of the epithelial cell population, and these showed no significant within-individual  
282 changes over the visits. However, these cells exhibited significant association with age and self-

283 reported race/ethnicity. Although cell type decomposition was not the primary objective of the  
284 study, our analyses demonstrate that the saliva methylome can be highly informative of  
285 individual differences in perioperative immune profile.

286 For the effect of postsurgical opioid use, we focused on the *OPRM1* promoter region as an  
287 epigenetic sensor of opioid dose. The CpG-rich promoter harbors a CpG island and several  
288 studies in different populations have demonstrated higher DNA methylation at this site among  
289 opioid users and methadone-maintained heroin addicts [23, 29-33]. The increased methylation  
290 of the *OPRM1* promoter is not only limited to OUD but has also been detected among  
291 individuals with alcohol dependence, suggesting that the hypermethylation is generally  
292 associated with substance use disorder and addiction [34]. A question has been whether such  
293 epigenetic differences are the result of drug use or the cause of increased vulnerability to  
294 addiction [20]. To address this, we interrogated 10 CpGs in a 550 bp region that encompassed  
295 the promoter CpG island investigated by Nielson et al. and Chorbov et al. (the CpG island is  
296 depicted in Fig. 4) [29, 30]. With the exception of the last CpG, the remaining 9 CpGs showed  
297 higher methylation in the two higher-dose groups relative to the low-dose group, and four of  
298 these CpGs were significantly associated with dosage at nominal alpha of 0.05. Comparison of  
299 mean methylation differences between the dosage groups across the three visits indicated that  
300 the higher methylation in the higher dose groups is more apparent at the postsurgery visits,  
301 particularly visit 3. The positive association between the mean promoter methylation and  
302 cumulative MME, and mean promoter methylation and days of opioid use, were also significant  
303 only at visit 3. The heightened inflammatory state at visit 2, which occurred within a few days



304 from surgery, may have been the reason why the more subtle effect of opioids was not  
305 significant at visit 2, and the positive association emerged only at visit 3.

306 The *OPRM1* locus presents a prime site for gene x environment interaction, a critical aspect of  
307 addiction since the addictive substance is an environmental agent that has a long-lasting  
308 biological effect. The *OPRM1* gene has been the subject of several candidate gene studies for  
309 addiction. Much attention has been paid to the missense SNP that alters the *OPRM1* protein  
310 function, although its impact on addiction trait and OUD is somewhat ambiguous [46, 47].  
311 Several studies have also identified non-coding variants in the *OPRM1* locus that alters DNA  
312 methylation and gene expression [33, 35, 48]. At least one genome-wide association study has  
313 also identified a genome-wide significant association between a SNP upstream of *OPRM1* and  
314 methadone-maintenance dosing [37]. These studies collectively provide evidence that common  
315 genetic variants in the proximal region of *OPRM1* affect DNA methylation and gene expression  
316 and could have a downstream impact on opioid response that could potentially influence  
317 vulnerability to addiction. Our present work was carried out in a small sample size and our  
318 primary goal was to track the within-individual trajectory across the visits. If there were  
319 genetically modulated small cross-sectional differences at baseline, the present sampling would  
320 be underpowered to detect the differences, and the significant association with opioid dose we  
321 found may have been the result of opioid-induced augmentation of differential methylation at  
322 the postoperative visits.

323 The small sample size and the heterogeneity in methylome signal, partly due to cell  
324 composition and partly due to the heterogenous population group, were limitations that  
325 prevented a more comprehensive epigenome-wide exploration. The *OPRM1* promoter CpGs

326 may only be part of a network of genes that represent the acute cellular response to drug  
327 exposure. The present study also does not address if these epigenetic changes will linger in the  
328 absence of continued use. A more comprehensive longitudinal study of the early effects of  
329 prescriptions opioids with a longer follow-up period would be the next phase of study.

330 Regarding the potential for epigenetic persistence, we must point out that any peripheral tissue  
331 serves only as a proxy for the possible epigenetic changes in the brain. A distinction is that  
332 blood and epithelium are mitotically active tissues and cells are renewed within few days to few  
333 weeks, with the exception of the long-lived memory T-cells. For methylation signals to persist, it  
334 will require either continued presence of the perturbation (i.e., continued exposure to opioids),  
335 or methylation changes in mitotically active stem cells that can be faithfully transmitted to  
336 daughter cells. The brain, on the other hand, is mitotically inactive and consists of mostly  
337 terminally differentiated cells that last a lifetime. If the relatively modest dose and short-term  
338 use of prescription opioids has a similar impact in brain cells, the effects may not readily decay  
339 and may be long-lasting in the central nervous system.

## 340 **Conclusion**

341 In conclusion, our study replicates the hypermethylation of the *OPRM1* promoter with opioid  
342 use. Previous studies reported on the effects of chronic opioid use; here we provide evidence  
343 that the epigenetic restructuring begins within the initial stage of opioid exposure. The present  
344 findings on the acute effects of prescription opioids require further replication with a well-  
345 powered and more comprehensive study in a larger cohort.

## 346 **Methods**

347 **Participants**

348 Eligible participants were scheduled for tooth extractions at an oral and maxillofacial surgery  
349 clinic that were typically followed by postoperative prescriptions of  
350 hydrocodone/acetaminophen (7.5/325 mg q4-6h prn pain) or oxycodone/acetaminophen  
351 (5mg/325mg q6h prn pain). For inclusion in the study, individuals were required to be 18 years  
352 of age or older, opioid naïve, able to consent, able to understand and speak English, and willing  
353 to provide saliva samples. Individuals were excluded if they reported previous use of opioids,  
354 had current substance use dependence, were pregnant, were incarcerated, had other causes of  
355 pain, were unable to consent, or had a developmental disability that prevented participation.  
356 The study received approval by the university Institutional Review Board. Eligible participants  
357 were provided a summary of the consent form by the study coordinator and allowed to read  
358 and ask questions before enrollment. All participants provided written informed consent.  
359 Forty-one individuals consented to the study and provided contact information and responded  
360 to a demographic questionnaire. The clinical staff provided routine opioid medication and  
361 recovery instructions for all participants right after surgery. The opioids prescribed to  
362 participants were Hydrocodone, Oxycodone, and Codeine in doses that varied between 5mg to  
363 30mg (Table 1). The study coordinator also provided opioid medication logs to record self-  
364 administration including the date, time, individual dose per opioid pill, and the number of  
365 opioid pills taken. For the 33 participants who received opioid medication, only one participant  
366 (person ID 142) reported no opioid usage.

367 **Sample processing and DNA methylation assay**

368 Saliva was collected using the Oragene DNA sample collection kit (OGR 500) by DNA Genotek  
369 (<http://www.dnagenotek.com>). The first set of samples was collected before surgery. The  
370 second saliva sample was collected a few days after opioid discontinuation, and the third was  
371 collected on a follow-up visit (Fig. 1; Table 1). DNA was purified using the DNA Genotek PrepIT  
372 L2P kit according to manufacturer's instruction. Genome-wide DNA methylation was assayed  
373 on the Illumina Infinium Human MethylationEPIC BeadChips following the manufacturer's  
374 standard protocol at the HudsonAlpha Genomic Services Lab (<https://gsl.hudsonalpha.org>).

### 375 **Data processing**

376 Raw intensity IDAT files were loaded to R and all quality checks, data preprocessing, and  
377 normalization were carried out using the R package, minfi (v.1.31) [49]. Methylation levels were  
378 estimated as  $\beta$ -values (ratio of methylated by unmethylated probes) and quantile normalized.  
379 The initial QC involved comparison between the log median intensities of methylated and  
380 unmethylated channels, and the density plots for  $\beta$ -values (Additional file 2: Fig. S1a). All  
381 samples passed these checks. Sex estimated from the DNA methylation data also matched the  
382 self-reported sex. To retain only high-quality data, probes with detection p-value  $> 0.01$  (14,676  
383 probes) were excluded. Probes that target CpGs on the sex chromosomes were also removed  
384 (18,605 probes). Finally, a total of 96,146 probes that overlapped annotated SNPs and/or were  
385 flagged for poor mapping quality (MASK.general list from [50]) were also filtered out. A total of  
386 736,432 high quality probes were retained and used for downstream analysis.

387 As further QC, we performed unsupervised hierarchical clustering using the full set of high-  
388 quality probes (Additional file 2: Fig. S1b). While samples longitudinally collected from the same

389 individual tended to cluster together, there were also several samples that did not cluster with  
390 self. To check for possible errors in sample labeling, we repeated the cluster analysis using a  
391 subset of 30,435 probes that had been filtered out due to overlap with common SNPs. While  
392 these are deemed as poor-quality probes and unfit for differential methylation analysis, in  
393 terms of sample identity check, these probes can serve as proxy genotype markers that can  
394 help verify if samples came from the same person. Using this set, almost all samples collected  
395 from the same participant clustered with self, and for the most part, the clusters also aligned  
396 with self-reported race/ethnicity groups (Additional file 2: Fig. S1c). Only one of the 33  
397 participant who received prescription opioids (person ID 108) did not pair with self and data  
398 from this person was excluded from all downstream analysis.

### 399 **Estimation of cellular proportions**

400 To infer the relative proportions of the major cell types, we first implemented a reference-free  
401 deconvolution of the methylome data using the R package RefFreeEWAS (v2.2) [51]. The  
402 RefFreeEWAS algorithm applies a non-negative matrix factorization to decompose a matrix  $Y =$   
403  $M\Omega$ , where  $M$  represents an  $m \times K$  matrix with  $m$  as CpG specific methylation for an unknown  
404 number of  $K$  cell types, and  $\Omega$  as the cell-type proportion constrained to sum to a value  $\leq 1$ . For  
405 computational efficiency, the  $K$  cell types has to be first specified, and as described in  
406 Houseman et al. [51], we set the  $K$  to vary from 2 to 10 cell types and decomposed the  $Y = M\Omega$ .  
407 Following this, we applied bootstrapping to estimate the optimal  $K$  value. For this estimation,  
408 we applied 10 interactions with replacement every 1000 times. The optimal  $K = 4$  was selected  
409 based on the minimum value of the average of bootstrapped deviances for each putative cell  
410 type. While this method provides the relative proportions of the cell types, the identity of the

411 four cells are unknown. Since a significant proportion of saliva consists of leukocytes, we also  
412 applied a reference-based approach to estimate the relative proportions of lymphocytes and  
413 neutrophils [39, 42, 43]. To infer the putative identities of cells, we performed Pearson  
414 correlations between the *K* cells and the proportions of leukocyte types.

#### 415 **Statistical analyses**

416 For the global analysis, PCA was done on the full set of 736,432 probes using the `prcomp`  
417 function in R. To evaluate which variable had the most significant association with PC1, we  
418 examined the association between PC1 and the following variables: sex, age, self-reported  
419 race/ethnicity, opioid dose, days from surgery to sample collection, and days from last opioid  
420 dose to sample collection. We used ANOVA for categorical variables, and Pearson correlation for  
421 continuous variables, and these tests were done for the three visits separately. We also  
422 performed similar analyses for the estimated cell proportions to examine whether the variables  
423 were significantly related to the estimated cell proportions. PC1 and the cell proportions was  
424 also related to visit using ANOVA. Since visit was the most significant explanatory variable for  
425 PC1, we identified the CpGs that showed longitudinal change over the three visits by applying a  
426 mixed-effects ANOVA:  $\beta\text{-value} \sim \text{visit} + \text{Error}(\text{ID}/\text{visit})$ . This epigenome-wide analysis was done  
427 in the 26 participants with data from all 3 visits. For the set of genome-wide suggestive CpGs  
428 that changed over the visits (uncorrected  $p\text{-value} \leq 10^{-5}$ ), GSEA was implemented on the  
429 WebGestalt platform (<http://www.webgestalt.org>) with each CpG ranked by the mean  $\beta\text{-value}$   
430 difference between v2 and v1.

431 For candidate gene analysis, we surveyed the promoter region of *OPRM1*. The CpG island that  
432 was interrogated by Nielson et al., and Chorbov et al. is located at 154360587–154360922 bp of  
433 chromosome 6 (GRCh37/hg19) [29, 30]. Within that exact coordinate, our data only had 4 CpG  
434 probes. We therefore considered a slightly wider region (550 bp) and in total, and the array  
435 data contained 10 probes that targeted promoter CpGs at chr6:154360344-154360894 bp. To  
436 evaluate methylation at individual CpGs, we applied a linear mixed effects model with the  
437 dosage group and visit as fixed categorical variables, and person ID as random intercept:  
438  $\text{lmer}(\beta\text{-value} \sim \text{dosage} + \text{visit} + (1|ID))$ . This was done using the “lmerTest” R package, and to get  
439 the p-values for the main effect of dosage groups, the degrees of freedom were computed by  
440 the Satterthwaite’s method [52, 53]. Following the CpG level analysis, we estimated the general  
441 methylation trend for the promoter by averaging the  $\beta$ -values for the 9 CpGs that had a positive  
442 regression coefficient with the dosage groups. We then tested the association between the  
443 promoter mean methylation score, and two opioid related continuous variables: length of  
444 opioid use in days, and cumulative MME. This analysis was done for the three visits separately,  
445 and adjusted for age and cellular heterogeneity using the equations  $\text{lm}(\text{mean-}\beta \sim \text{MME} + \text{age} +$   
446  $\text{cell1} + \text{cell2} + \text{cell3})$ , and  $\text{lm}(\text{mean-}\beta \sim \text{days-of-use} + \text{age} + \text{cell1} + \text{cell2} + \text{cell3})$ .

#### 447 **List of Abbreviations**

448 FDR: False discovery rate

449 GO: Gene ontology

450 GSEA: Gene Set Enrichment Analysis

451 KEGG: Kyoto encyclopedia of genes and genomes

452 MME: Morphine milligram equivalent

453 OPRM1: Opioid receptor mu 1

454 OUD: Opioid use disorder

455 PC: Principal component

456 PCA: Principal component analysis

457 QC: Quality control

458 SNP: Single nucleotide polymorphism

## 459 **Declarations**

460 **Ethics approval and consent to participate:** All participants provided written informed consent  
461 and study received IRB approval.

462 **Data availability.** The full de-identified raw DNA methylation data will be made available from  
463 the NCBI NIH Gene Expression Omnibus repository upon official publication.

464 **Competing interests:** We have no financial or non-financial conflicts of interest.

465 **Funding:** Funded by the University of Tennessee Health Science Center CORNET Clinical Awards

466 **Author contributions:** JVSS: performed lab work and data analysis and contributed to  
467 manuscript; FISG: contributed to data analysis; JHB: identified suitable patients and facilitated  
468 participant recruitment at the dental clinic; KJD: contributed to study conception and design;  
469 KM: contributed to study conception, design and data analysis, and wrote the manuscript. All  
470 authors contributed to and approved the final version of the manuscript.



471 **Acknowledgements**

472 We thank the UTHSC Office of Research and the CORNET Awards for supporting this project.

## 473 References

- 474 1. Porter J, Jick H: **Addiction rare in patients treated with narcotics.** *N Engl J Med* 1980,  
475 **302**:123.
- 476 2. Rummans TA, Burton MC, Dawson NL: **How Good Intentions Contributed to Bad**  
477 **Outcomes: The Opioid Crisis.** *Mayo Clinic Proceedings* 2018, **93**:344-350.
- 478 3. Administration SAaMHS: **Results from the 2017 National Survey on Drug Use and**  
479 **Health:**  
480 **Detailed Tables.** 2017.
- 481 4. **Understanding the Epidemic**  
482 [<https://www.cdc.gov/drugoverdose/epidemic/index.html>]
- 483 5. Edlund MJ, Martin BC, Russo JE, DeVries A, Braden JB, Sullivan MD: **The role of opioid**  
484 **prescription in incident opioid abuse and dependence among individuals with chronic**  
485 **noncancer pain: the role of opioid prescription.** *Clin J Pain* 2014, **30**:557-564.
- 486 6. National Academies of Sciences E, and Medicine.: *Pain management and the opioid*  
487 *epidemic: Balancing societal and individual benefits and risks of prescription opioid use.*  
488 Washington, DC: The National Academies Press; 2017.
- 489 7. Schroeder AR, Dehghan M, Newman TB, Bentley JP, Park KT: **Association of Opioid**  
490 **Prescriptions From Dental Clinicians for US Adolescents and Young Adults With**  
491 **Subsequent Opioid Use and Abuse.** *JAMA Intern Med* 2019, **179**:145-152.
- 492 8. Shah A, Hayes CJ, Martin BC: **Characteristics of Initial Prescription Episodes and**  
493 **Likelihood of Long-Term Opioid Use — United States, 2006–**  
494 **2015.** *Mmwr-Morbidity and Mortality Weekly Report* 2017, **66**:265–269.
- 495 9. Denisco RC, Kenna GA, O'Neil MG, Kulich RJ, Moore PA, Kane WT, Mehta NR, Hersh EV,  
496 Katz NP: **Prevention of prescription opioid abuse The role of the dentist.** *Journal of the*  
497 *American Dental Association* 2011, **142**:800-810.
- 498 10. Rasubala L, Pernapati L, Velasquez X, Burk J, Ren YF: **Impact of a Mandatory**  
499 **Prescription Drug Monitoring Program on Prescription of Opioid Analgesics by**  
500 **Dentists.** *PLoS One* 2015, **10**:e0135957.
- 501 11. Tong ST, Hochheimer CJ, Brooks EM, Sabo RT, Jiang V, Day T, Rozman JS, Kashiri PL, Krist  
502 AH: **Chronic Opioid Prescribing in Primary Care: Factors and Perspectives.** *Ann Fam*  
503 *Med* 2019, **17**:200-206.
- 504 12. Alam A, Gomes T, Zheng H, Mamdani MM, Juurlink DN, Bell CM: **Long-term analgesic**  
505 **use after low-risk surgery: a retrospective cohort study.** *Arch Intern Med* 2012,  
506 **172**:425-430.
- 507 13. Brummett CM, Waljee JF, Goesling J, Moser S, Lin P, Englesbe MJ, Bohnert ASB,  
508 Kheterpal S, Nallamothu BK: **New Persistent Opioid Use After Minor and Major Surgical**  
509 **Procedures in US Adults.** *JAMA Surg* 2017, **152**:e170504.
- 510 14. Cicero TJ, Ellis MS, Surratt HL, Kurtz SP: **The changing face of heroin use in the United**  
511 **States: a retrospective analysis of the past 50 years.** *JAMA Psychiatry* 2014, **71**:821-  
512 826.

- 513 15. Sun EC, Darnall BD, Baker LC, Mackey S: **Incidence of and Risk Factors for Chronic**  
514 **Opioid Use Among Opioid-Naive Patients in the Postoperative Period.** *JAMA Intern*  
515 *Med* 2016, **176**:1286-1293.
- 516 16. Nestler EJ: **Epigenetic mechanisms of drug addiction.** *Neuropharmacology* 2014, **76 Pt**  
517 **B**:259-268.
- 518 17. Browne CJ, Godino A, Sallery M, Nestler EJ: **Epigenetic Mechanisms of Opioid Addiction.**  
519 *Biol Psychiatry* 2020, **87**:22-33.
- 520 18. Flagel SB, Chaudhury S, Waselus M, Kelly R, Sewani S, Clinton SM, Thompson RC,  
521 Watson SJ, Jr., Akil H: **Genetic background and epigenetic modifications in the core of**  
522 **the nucleus accumbens predict addiction-like behavior in a rat model.** *Proc Natl Acad*  
523 *Sci U S A* 2016, **113**:E2861-2870.
- 524 19. Koo JW, Mazei-Robison MS, LaPlant Q, Egervari G, Braunscheidel KM, Adank DN,  
525 Ferguson D, Feng J, Sun H, Scobie KN, et al: **Epigenetic basis of opiate suppression of**  
526 **Bdnf gene expression in the ventral tegmental area.** *Nat Neurosci* 2015, **18**:415-422.
- 527 20. Nielsen DA, Utrankar A, Reyes JA, Simons DD, Kosten TR: **Epigenetics of drug abuse:**  
528 **predisposition or response.** *Pharmacogenomics* 2012, **13**:1149-1160.
- 529 21. Kozlenkov A, Jaffe AE, Timashpolsky A, Apontes P, Rudchenko S, Barbu M, Byne W, Hurd  
530 YL, Horvath S, Dracheva S: **DNA Methylation Profiling of Human Prefrontal Cortex**  
531 **Neurons in Heroin Users Shows Significant Difference between Genomic Contexts of**  
532 **Hyper- and Hypomethylation and a Younger Epigenetic Age.** *Genes (Basel)* 2017, **8**.
- 533 22. Egervari G, Landry J, Callens J, Fullard JF, Roussos P, Keller E, Hurd YL: **Striatal H3K27**  
534 **Acetylation Linked to Glutamatergic Gene Dysregulation in Human Heroin Abusers**  
535 **Holds Promise as Therapeutic Target.** *Biol Psychiatry* 2017, **81**:585-594.
- 536 23. Doehring A, Oertel BG, Sittl R, Lotsch J: **Chronic opioid use is associated with increased**  
537 **DNA methylation correlating with increased clinical pain.** *Pain* 2013, **154**:15-23.
- 538 24. Montalvo-Ortiz JL, Cheng Z, Kranzler HR, Zhang H, Gelernter J: **Genomewide Study of**  
539 **Epigenetic Biomarkers of Opioid Dependence in European- American Women.** *Sci Rep*  
540 2019, **9**:4660.
- 541 25. Bleich S, Lenz B, Ziegenbein M, Beutler S, Frieling H, Kornhuber J, Bonsch D: **Epigenetic**  
542 **DNA hypermethylation of the HERP gene promoter induces down-regulation of its**  
543 **mRNA expression in patients with alcohol dependence.** *Alcohol Clin Exp Res* 2006,  
544 **30**:587-591.
- 545 26. Bonsch D, Lenz B, Reulbach U, Kornhuber J, Bleich S: **Homocysteine associated genomic**  
546 **DNA hypermethylation in patients with chronic alcoholism.** *J Neural Transm (Vienna)*  
547 2004, **111**:1611-1616.
- 548 27. Knothe C, Doehring A, Ultsch A, Lotsch J: **Methadone induces hypermethylation of**  
549 **human DNA.** *Epigenomics* 2016, **8**:167-179.
- 550 28. Marie-Claire C, Crettol S, Cagnard N, Bloch V, Mouly S, Laplanche JL, Bellivier F, Lepine  
551 JP, Eap C, Vorspan F: **Variability of response to methadone: genome-wide DNA**  
552 **methylation analysis in two independent cohorts.** *Epigenomics* 2016, **8**:181-195.
- 553 29. Chorbov VM, Todorov AA, Lynskey MT, Cicero TJ: **Elevated levels of DNA methylation at**  
554 **the OPRM1 promoter in blood and sperm from male opioid addicts.** *J Opioid Manag*  
555 2011, **7**:258-264.

- 556 30. Nielsen DA, Yuferov V, Hamon S, Jackson C, Ho A, Ott J, Kreek MJ: **Increased OPRM1**  
557 **DNA methylation in lymphocytes of methadone-maintained former heroin addicts.**  
558 *Neuropsychopharmacology* 2009, **34**:867-873.
- 559 31. Ebrahimi G, Asadikaram G, Akbari H, Nematollahi MH, Abolhassani M, Shahabinejad G,  
560 Khodadadnejad L, Hashemi M: **Elevated levels of DNA methylation at the OPRM1**  
561 **promoter region in men with opioid use disorder.** *Am J Drug Alcohol Abuse* 2018,  
562 **44**:193-199.
- 563 32. Nielsen DA, Hamon S, Yuferov V, Jackson C, Ho A, Ott J, Kreek MJ: **Ethnic diversity of**  
564 **DNA methylation in the OPRM1 promoter region in lymphocytes of heroin addicts.**  
565 *Hum Genet* 2010, **127**:639-649.
- 566 33. Yuferov V, Levran O, Proudnikov D, Nielsen DA, Kreek MJ: **Search for genetic markers**  
567 **and functional variants involved in the development of opiate and cocaine addiction**  
568 **and treatment.** *Ann N Y Acad Sci* 2010, **1187**:184-207.
- 569 34. Zhang H, Herman AI, Kranzler HR, Anton RF, Simen AA, Gelernter J: **Hypermethylation of**  
570 **OPRM1 promoter region in European Americans with alcohol dependence.** *J Hum*  
571 *Genet* 2012, **57**:670-675.
- 572 35. Hancock DB, Levy JL, Gaddis NC, Glasheen C, Saccone NL, Page GP, Hulse GK,  
573 Wildenauer D, Kelty EA, Schwab SG, et al: **Cis-Expression Quantitative Trait Loci**  
574 **Mapping Reveals Replicable Associations with Heroin Addiction in OPRM1.** *Biol*  
575 *Psychiatry* 2015, **78**:474-484.
- 576 36. LaForge KS, Yuferov V, Kreek MJ: **Opioid receptor and peptide gene polymorphisms:**  
577 **potential implications for addictions.** *Eur J Pharmacol* 2000, **410**:249-268.
- 578 37. Smith AH, Jensen KP, Li J, Nunez Y, Farrer LA, Hakonarson H, Cook-Sather SD, Kranzler  
579 HR, Gelernter J: **Genome-wide association study of therapeutic opioid dosing identifies**  
580 **a novel locus upstream of OPRM1.** *Mol Psychiatry* 2017, **22**:346-352.
- 581 38. Houseman EA, Kile ML, Christiani DC, Ince TA, Kelsey KT, Marsit CJ: **Reference-free**  
582 **deconvolution of DNA methylation data and mediation by cell composition effects.**  
583 *BMC Bioinformatics* 2016, **17**:259.
- 584 39. Houseman EA, Accomando WP, Koestler DC, Christensen BC, Marsit CJ, Nelson HH,  
585 Wiencke JK, Kelsey KT: **DNA methylation arrays as surrogate measures of cell mixture**  
586 **distribution.** *BMC Bioinformatics* 2012, **13**:86.
- 587 40. Theda C, Hwang SH, Czajko A, Loke YJ, Leong P, Craig JM: **Quantitation of the cellular**  
588 **content of saliva and buccal swab samples.** *Sci Rep* 2018, **8**:6944.
- 589 41. Ni Choileain N, Redmond HP: **Cell response to surgery.** *Arch Surg* 2006, **141**:1132-1140.
- 590 42. Koestler DC, Christensen B, Karagas MR, Marsit CJ, Langevin SM, Kelsey KT, Wiencke JK,  
591 Houseman EA: **Blood-based profiles of DNA methylation predict the underlying**  
592 **distribution of cell types: a validation analysis.** *Epigenetics* 2013, **8**:816-826.
- 593 43. Reinius LE, Acevedo N, Joerink M, Pershagen G, Dahlen SE, Greco D, Soderhall C,  
594 Scheynius A, Kere J: **Differential DNA methylation in purified human blood cells:**  
595 **implications for cell lineage and studies on disease susceptibility.** *PLoS One* 2012,  
596 **7**:e41361.
- 597 44. Jaffe AE, Irizarry RA: **Accounting for cellular heterogeneity is critical in epigenome-wide**  
598 **association studies.** *Genome Biol* 2014, **15**:R31.

- 599 45. Tabuchi T, Shimazaki J, Satani T, Nakachi T, Watanabe Y, Tabuchi T: **The perioperative**  
600 **granulocyte/lymphocyte ratio is a clinically relevant marker of surgical stress in**  
601 **patients with colorectal cancer.** *Cytokine* 2011, **53**:243-248.
- 602 46. Hancock DB, Markunas CA, Bierut LJ, Johnson EO: **Human Genetics of Addiction: New**  
603 **Insights and Future Directions.** *Curr Psychiatry Rep* 2018, **20**:8.
- 604 47. Kalsi G, Euesden J, Coleman JR, Ducci F, Aliev F, Newhouse SJ, Liu X, Ma X, Wang Y,  
605 Collier DA, et al: **Genome-Wide Association of Heroin Dependence in Han Chinese.**  
606 *PLoS One* 2016, **11**:e0167388.
- 607 48. Oertel BG, Doehring A, Roskam B, Kettner M, Hackmann N, Ferreiros N, Schmidt PH,  
608 Lotsch J: **Genetic-epigenetic interaction modulates mu-opioid receptor regulation.**  
609 *Hum Mol Genet* 2012, **21**:4751-4760.
- 610 49. Aryee MJ, Jaffe AE, Corrada-Bravo H, Ladd-Acosta C, Feinberg AP, Hansen KD, Irizarry  
611 RA: **Minfi: a flexible and comprehensive Bioconductor package for the analysis of**  
612 **Infinium DNA methylation microarrays.** *Bioinformatics* 2014, **30**:1363-1369.
- 613 50. Zhou W, Laird PW, Shen H: **Comprehensive characterization, annotation and**  
614 **innovative use of Infinium DNA methylation BeadChip probes.** *Nucleic Acids Res* 2017,  
615 **45**:e22.
- 616 51. Houseman EA, Molitor J, Marsit CJ: **Reference-free cell mixture adjustments in analysis**  
617 **of DNA methylation data.** *Bioinformatics* 2014, **30**:1431-1439.
- 618 52. Bates D, Machler M, Bolker BM, Walker SC: **Fitting Linear Mixed-Effects Models Using**  
619 **lme4.** *Journal of Statistical Software* 2015, **67**:1-48.
- 620 53. Kuznetsova A, Brockhoff PB, Christensen RHB: **ImerTest Package: Tests in Linear Mixed**  
621 **Effects Models.** *Journal of Statistical Software* 2017, **82**:1–26.
- 622

623

## 624 **Figure legends**

625 **Fig 1. Timeline of sample collection.** Saliva samples were collected before surgery and the two  
626 follow-up visits after surgery and end of opioid self-administration. The notations above the  
627 arrows show the range of days between events.

628

## 629 **Figure 2. Global patterns in DNA methylation across visits**

630 **(a)** The top principal component (PC1) extracted from the methylome-wide data explained  
631 63.5% of the variance, and the ANOVA plot shows significant differences between the three  
632 visits ( $F_{2,86} = 5.94$ ,  $p$ -value = 0.004). **(b)** At visit 2, PC1 is correlated with number of days from  
633 surgery to the second visit ( $r = 0.40$ ,  $p$ -value = 0.03,  $n = 31$ ). **(c)** The epigenome-wide association  
634 plot depicts the location of each CpG (autosomal chromosomes 1 to 22 on the x-axis) and the --  
635  $\log_{10}(p$ -value) for the effect of visit (y-axis). Genome-wide significant threshold is set at  $p$ -value  
636 =  $5 \times 10^{-8}$  (upper red horizontal line); suggestive threshold is set at  $p$ -value =  $10^{-5}$  (lower blue  
637 horizontal line). **(d)** Distribution of  $p$ -values for the effect of visit shows a significant deviation  
638 from the null hypothesis. **(e)** For the CpGs above the suggestive threshold, comparison of mean  
639 differences between visit 1 and visit 2 (x-axis), and visit 3 and visit 2 (y-axis) indicates a reversal  
640 in methylation patterns from visit 2 to visit 3, with majority of sites showing lower methylation  
641 at visit 2, and then increasing in methylation by visit 3.

642

## 643 **Figure 3. Estimated cell type proportions and associated variables**

644 **(a)** Cell 1 shows both longitudinal and cross-sectional variability. Proportion of cell 1 is  
645 negatively correlated with age at visit 2 ( $r = -0.48$ ,  $p$ -value = 0.006,  $n = 31$ ; black squares and  
646 dashed line), but not at visit 1 ( $r = -0.13$ ,  $p$ -value = 0.49,  $n = 31$ ; red x markers and dotted line),  
647 and only slightly at visit 3 ( $r = -0.32$ ,  $p$ -value = 0.10,  $n = 27$ ; grey circles and solid line). **(b)** Cell 3  
648 is associated with cross-sectional variability but no significant longitudinal change. The  
649 estimated proportion has a strong positive correlation with age at all three visits. At visit 1,  $r =$   
650 0.36 ( $p$ -value = 0.05); visit 2,  $r = 0.57$  ( $p$ -value = 0.0009); visit 3,  $r = 0.48$  ( $p$ -value = 0.01). **(c)** Cell  
651 3 also shows a significantly higher proportion in African Americans at all three visits ( $F_{2,28} =$   
652 15.66,  $p$ -value < 0.0001 at visit 1). **(d)** Cell 2 is also ethnicity specific and associated with lower  
653 proportion in African Americans at all three visits ( $F_{2,28} = 4.77$ ,  $p$ -value < 0.02 at visit 1).

654

#### 655 **Figure 4. *OPRM1* promoter CpG methylation**

656 **(a)** The *OPRM1* promoter and the CpG island (green block) are depicted along with base pair  
657 coordinates (black line; GRCh37/hg19), and location of the 10 CpGs (filled circles). Residual  $\beta$ -  
658 values were extracted after fitting participant ID as random intercept, and the plots show the  
659 methylation patterns across the three visits for CpG1, CpG2, CpG6, and CpG7 (panels with  
660 ANOVA line plots; error bars are standard error). The difference between the dosage groups  
661 appear at visit 3 (for CpG1, CpG2, CpG6) and visit 2 (for CpG7). The lowest cumulative dose  
662 group (<25 MME: blue dotted line) has lower average methylation compared to the two higher  
663 cumulative dose groups (25–90 MME: yellow dashed line;  $\geq 90$  MME: red solid line). **(b)** The  
664 promoter mean methylation was taken as the average  $\beta$ -values for CpG1 to CpG9. After fitting a

665 regression model with adjustment for age and cell proportions, the leverage plots show a  
666 significantly higher average promoter methylation (y-axes) associated with higher MME (x-axis,  
667 left panel), and longer duration of use (x-axis; right panel). MME is morphine milligram  
668 equivalent.



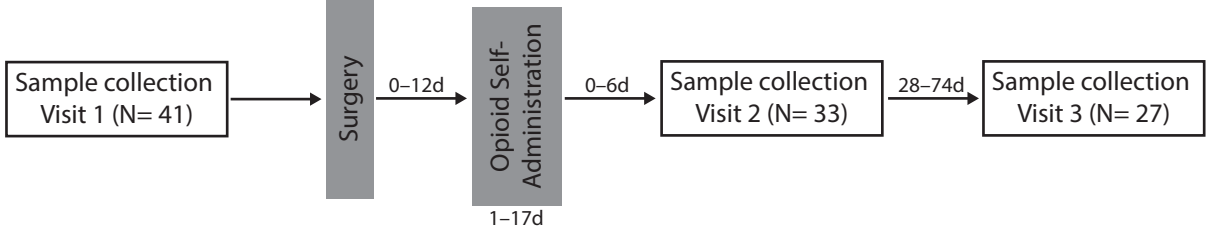

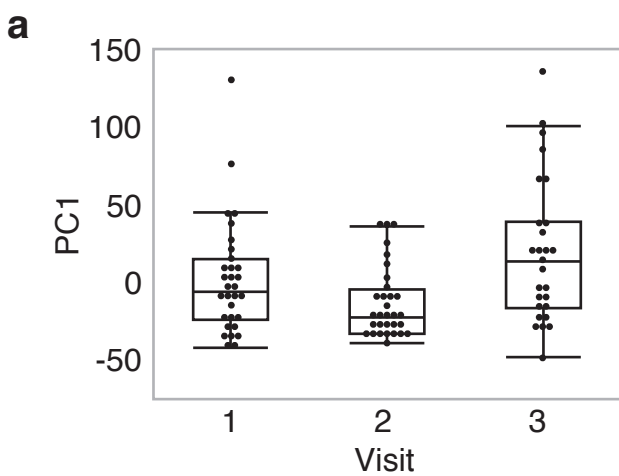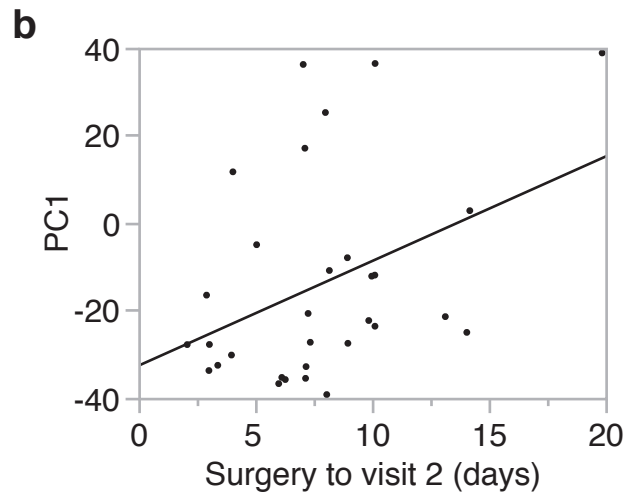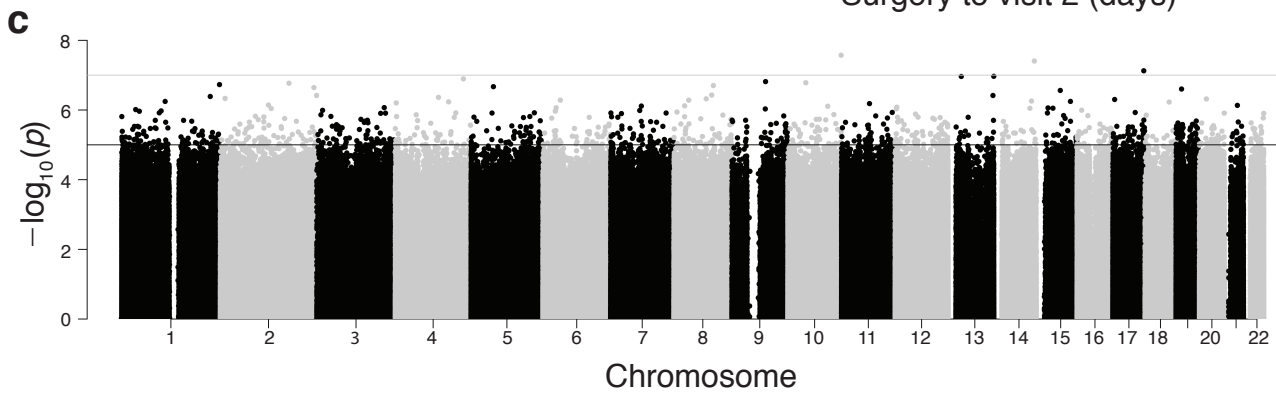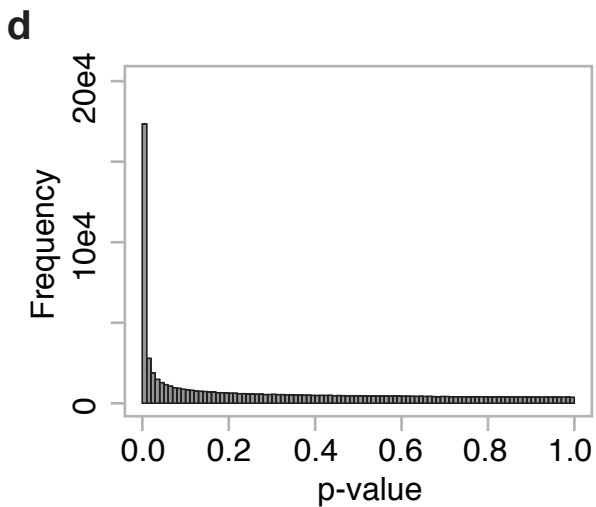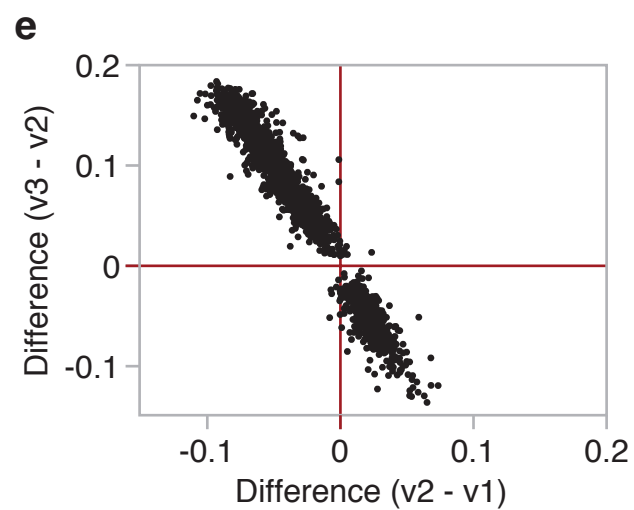

**a**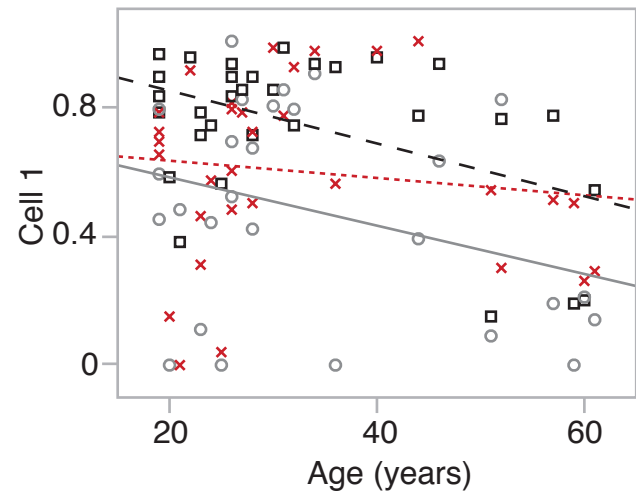**b**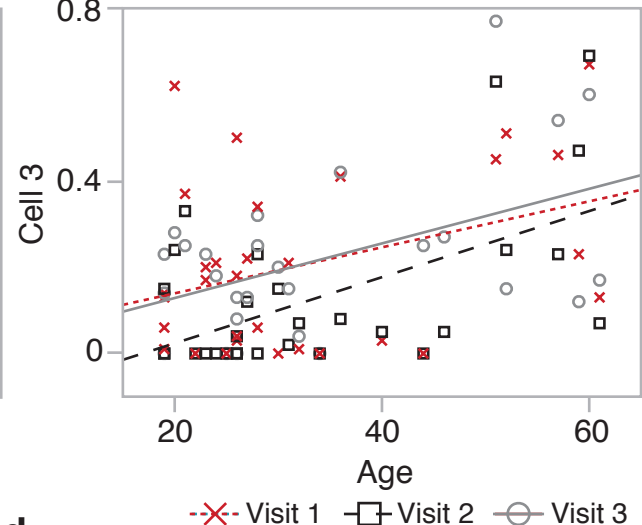**c**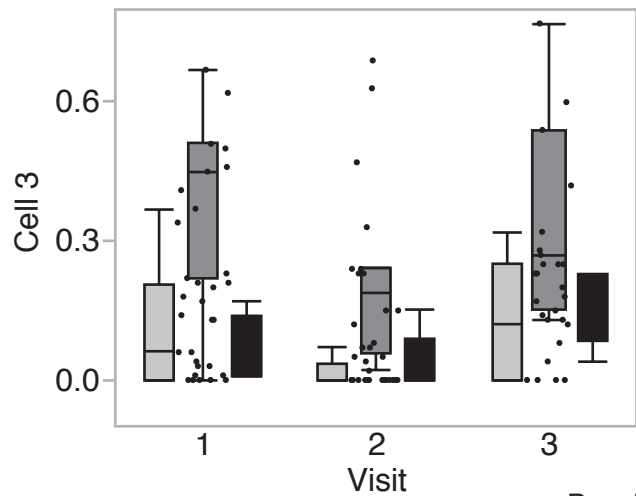**d**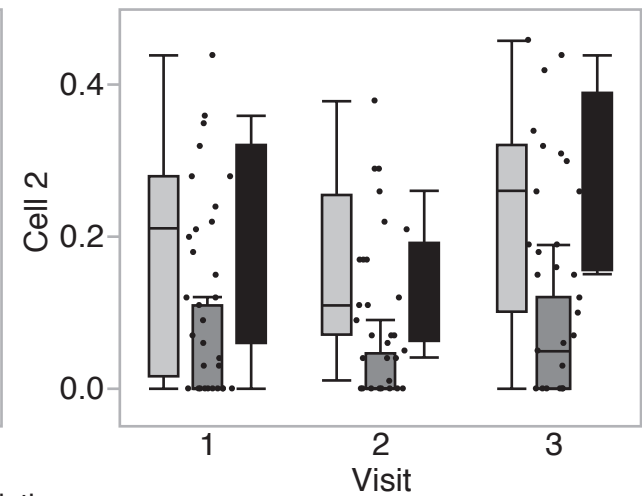

Population group

Caucasians/White
  AfricanAmericans/Black
  Other

**a**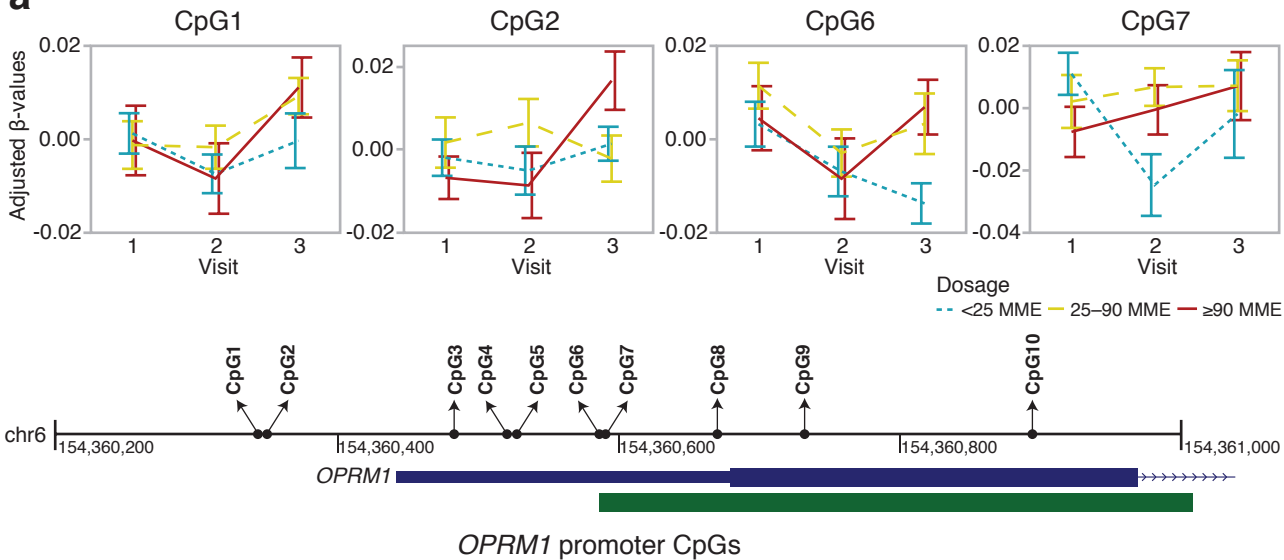**b**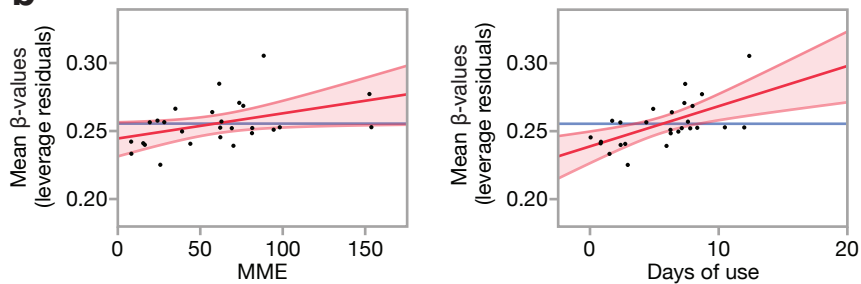

Source: https://www.biorxiv.org/content/10.1101/2020.01.24.919084v1.full.pdf
